# Supplementary material
Source: PubMed Central journal article supplement (PMC8086516)
Supplement: NIHMS1697127-supplement-Supplemental_Tables.pdf [file NIHMS1697127-supplement-Supplemental_Tables.pdf]

**Supplementary Table 1: Selected statistics for the reported sessions; column two also indicates the figure(s) this session is shown in. Same identity trial aggregates are indicated by the S string, different identity trial aggregates by the D string. Microstimulation during Cue2 is indicated by the MSC02 string, d: d', c: criterion c, effect size: percent correct difference between trials with and without microstimulation, P denotes the significance of the effect size (Fisher's exact test), a value of 0 denotes < 0.000000005. This table contains all sessions for experiments 1, 2, 6, and 7.**

| Session    | Figure              | Current $\mu$ A | Notes        | Subject | Target | #Trials noMS | #Trials MS | d(S,D)      | d(\$ MSC02 D MSC02) | c(S,D)       | c(\$ MSC02 D MSC02) | effect-size %(\$ MSC02 S) | effect-size %(\$ MSC02-D) | P(\$ MSC02-S) | P(D MSC02-D) |
|------------|---------------------|-----------------|--------------|---------|--------|--------------|------------|-------------|---------------------|--------------|---------------------|---------------------------|---------------------------|---------------|--------------|
| 1301301432 |                     | 300             |              | 1       | ML     | 1086         | 532        | 1.686538965 | 0.858956888         | -0.322729316 | 0.863789605         | -54.61612844              |                           | 0             | 0            |
| 1302011544 | F2c, S7a            | 300             |              | 1       | ML     | 1840         | 528        | 2.070566448 | 1.321942213         | -0.174125069 | 1.739065271         | -74.62511202              |                           | 0             | 0            |
| 1302131221 | F2a, F3ab, F4d, S7b | 300             | 200ms MS dur | 1       | AM     | 1513         | 512        | 1.801223111 | 0.513693857         | -0.471112831 | 1.340584859         | -77.56848668              |                           | 0             | 0            |
| 1302131221 | S7d                 | 300             | 50ms MS dur  | 1       | AM     | 633          | 205        | 1.722945485 | 1.480569841         | -0.361200103 | 0.788507994         | -40.85041256              |                           | 0             | 0.00000284   |
| 1302141229 | S1d                 | 300             |              | 1       | AM     | 917          | 298        | 1.998003529 | 0.803505246         | -0.194793308 | 1.795925832         | -80.20882772              |                           | 0             | 0            |
| 1302141229 | S1c                 | 100             |              | 1       | AM     | 320          | 110        | 1.892470749 | 1.436327189         | -0.188681244 | 0.077496705         | -13.2664437               |                           | 0.038950037   | 1            |
| 1302151316 | F2g                 | 300             |              | 1       | AF     | 1366         | 543        | 2.15596015  | 1.933895824         | -0.022354344 | 1.172632834         | -44.58882611              |                           | 0             | 0            |
| 1302161303 | F2e                 | 300             |              | 1       | AL     | 575          | 184        | 1.539885097 | 0.361516264         | -0.302243749 | 1.125427723         | -68.57680251              |                           | 0             | 0.00001072   |
| 1303271654 | F3ab, F6bd, S1b     | 300             |              | 1       | AM     | 127          | 66         | 1.637281533 | 0.264544679         | -0.022980467 | 1.307259132         | -68                       |                           | 0.000000005   | 0.093591932  |
| 1303271654 | S1a                 | 100             |              | 1       | AM     | 301          | 98         | 2.224427902 | 1.570660717         | 0.194892765  | 1.233755842         | -49.35897436              |                           | 0             | 0.195888465  |
| 1303301907 |                     | 300             |              | 1       | AM     | 156          | 71         | 1.761764574 | Inf                 | -0.375561198 | Inf                 | -37.05223881              |                           | 0             | 0.001566806  |
| 1303311208 | F2b, F3ab, S7c      | 300             |              | 2       | AM     | 864          | 480        | 1.277114884 | 0.480854723         | -0.209986223 | 1.282192326         | -65.31720366              |                           | 0             | 0            |
| 1304011724 | F3ab                | 300             |              | 1       | AM     | 480          | 307        | 1.440293741 | 1.336884534         | -0.218667446 | 0.493740359         | -25.67438908              |                           | 0.00000133    | 0.000012209  |
| 1304021204 | F3ab, F4f           | 300             |              | 2       | AM     | 246          | 122        | 1.301361205 | 0.534792829         | -0.641113173 | 0.871981761         | -62.90584416              |                           | 0             | 0.00001194   |
| 1304031338 | F8bd                | 300             |              | 1       | AM     | 173          | 80         | 1.861416357 | Inf                 | -0.20420844  | Inf                 | -68.997669                |                           | 0             | 0.001446435  |
| 1304031338 | F3ab                | 300             |              | 1       | AM     | 176          | 94         | 1.270430179 | Inf                 | -0.180550624 | Inf                 | -67.36353078              |                           | 0             | 0.000002921  |
| 1304051608 | F3ab                | 300             |              | 1       | AM     | 177          | 209        | 1.98976802  | 1.021189969         | -0.696133228 | 0.966930807         | -63.047113805             |                           | 0             | 0.00001402   |
| 1304071529 | F3ab                | 300             |              | 1       | AM     | 647          | 146        | 1.802542039 | 1.025407537         | -0.274400841 | 0.385211415         | -32.94123486              |                           | 0.000000005   | 0.208795278  |
| 1304101638 | F3ab                | 300             |              | 1       | AM     | 54           | 20         | 2.443936389 | Inf                 | -0.42285432  | Inf                 | -75                       |                           | 0.000063605   | 0.11747686   |
| 1304111326 | F3ab, S1h           | 200             |              | 2       | AM     | 301          | 133        | 1.840544701 | 0.321287007         | -0.37325991  | 1.753862322         | -84.65423465              |                           | 0             | 0.000000841  |
| 1304111326 | S1g                 | 100             |              | 2       | AM     | 21           | 13         | 2.188061915 | 1.533703888         | 0.126609391  | -0.200736372        | 0                         |                           | 1             | 0.55         |
| 1304141610 |                     | 200             |              | 1       | OUTFP  | 172          | 83         | 1.934655682 | 0.869489931         | 0.077080954  | 0.062455605         | -16.81722043              |                           | 0.079943678   | 0.056937392  |
| 1304161430 | S1k                 | 300             |              | 2       | ML     | 381          | 182        | 2.285720434 | 1.28797043          | -0.2040459   | 1.153307535         | -60.57316065              |                           | 0             | 0.001435869  |
| 1304161430 | F2d, S1j            | 200             |              | 2       | ML     | 376          | 199        | 2.459825744 | 1.0931616           | -0.262491306 | 1.189926205         | -67.22033898              |                           | 0             | 0.002294058  |
| 1304161430 | S1i                 | 200             |              | 2       | ML     | 170          | 65         | 2.49195975  | 1.655707927         | -0.237560072 | 0.706266581         | -38.2647386               |                           | 0.000007134   | 0.228765611  |
| 1304171554 | S1f, S5bd           | 200             |              | 2       | AM     | 231          | 120        | 2.11828775  | Inf                 | -0.66064907  | Inf                 | -81.8049271               |                           | 0             | 0.000000001  |
| 1304171554 | S1e                 | 100             |              | 2       | AM     | 201          | 111        | 1.999388284 | 0.833755544         | -0.383299985 | 0.814499434         | -57.12121212              |                           | 0             | 0.022418098  |
| 1304172302 | F4a, S2c            | 200             |              | 1       | OUTFP  | 147          | 51         | 2.15079295  | 1.909191757         | -0.233775242 | -0.112974645        | 0                         |                           | 0.6843922     | 1            |
| 1305141946 |                     | 300             |              | 1       | AM     | 53           | 99         | 1.976028392 | 1.388292366         | 0.079563268  | 0.358108043         | -18.66028708              |                           | 0.176379152   | 1            |
| 1305171419 |                     | 300             |              | 1       | AM     | 140          | 57         | 2.150252837 | 0.577931135         | 0.316838661  | 0.385524183         | -13.43236074              |                           | 0.005995795   | 0.066951616  |
| 1305261621 |                     | 300             |              | 1       | AM     | 259          | 176        | 1.910512981 | 1.23482753          | -0.090081361 | 0.6512936           | -36.69617894              |                           | 0.000000085   | 0.083771469  |
| 1305271525 |                     | 300             |              | 1       | AM     | 442          | 332        | 1.888896931 | 0.561654617         | 0.004086575  | 0.382622908         | -8.209255533              |                           | 0             | 0.094666114  |
| 1305301548 |                     | 300             |              | 1       | AM     | 353          | 257        | 1.55186714  | 0.833711566         | -0.10144382  | 0.168128093         | -21.16448692              |                           | 0.000253277   | 0.668963621  |
| 1306011734 |                     | 300             |              | 2       | AM     | 303          | 194        | 1.832179976 | 1.159005192         | -0.51674692  | 0.236647291         | -28.99042915              |                           | 0.000000006   | 0.017695631  |
| 1306061659 |                     | 200             |              | 2       | AM     | 356          | 243        | 1.940681658 | 1.541998093         | -0.340403567 | -0.076540929        | -10.33750404              |                           | 0.015675491   | 0.785365392  |
| 1307111430 |                     | 300             |              | 1       | AM     | 797          | 522        | 1.954949401 | 0.856918057         | -0.155148184 | 0.166715805         | -7.041652441              |                           | 0             | 0.039021503  |
| 1307121543 |                     | 300             |              | 1       | AM     | 217          | 146        | 1.242770144 | 0.929423068         | -0.417054733 | 0.07188072          | -19.76895119              |                           | 0.003377239   | 0.112495225  |
| 1307181509 | F3ab, F5bd, S2b     | 100             |              | 1       | AM     | 415          | 274        | 1.605289883 | 0.887536951         | -0.381253665 | 0.802227269         | -52.1773399               |                           | 0             | 0.000006446  |
| 1307190955 | S2a                 | 50              |              | 1       | AM     | 126          | 81         | 1.379884696 | 1.102445202         | -0.277479218 | 0.485210789         | -30.70175439              |                           | 0.001294164   | 0.052377865  |
| 1307211710 | F3ab                | 300             |              | 1       | AM     | 515          | 310        | 2.146538772 | 1.30231645          | -0.418159013 | 0.121034989         | -23.00887167              |                           | 0.000000001   | 0.467498474  |
| 1307251707 | F3ab                | 200             |              | 2       | AM     | 400          | 287        | 1.76275855  | 1.090637891         | -0.752303003 | 0.160983617         | -29.92021728              |                           | 0             | 0.00088359   |
| 1307261725 |                     | 50              |              | 2       | AM     | 237          | 145        | 1.748759193 | 1.742225737         | -0.315142619 | -0.047670381        | -6.198736049              |                           | 0.271094102   | 0.247145322  |
| 1307271417 |                     | 50              |              | 2       | AM     | 229          | 150        | 2.356376789 | 2.454605527         | -0.410416897 | 0.510805263         | -18.07673389              |                           | 0.000594665   | 0.00040171   |
| 1307291233 | F3ab, F6h           | 300             |              | 2       | AM     | 471          | 283        | 1.90948344  | 1.275258778         | -0.583592397 | 0.310067899         | -30.96381506              |                           | 0             | 0.000180501  |
| 1307291233 | F3ab                | 300             |              | 2       | AM     | 250          | 172        | 2.184634337 | 1.144492757         | -0.382168487 | -0.234603312        | -13.97011046              |                           | 0.004882798   | 0.048406398  |
| 1307301727 | F3ab                | 300             |              | 2       | AM     | 763          | 510        | 2.38120399  | 1.354773952         | -0.396312687 | 0.094545468         | -22.37340154              |                           | 0             | 0.844639036  |
| 1308051316 | F3ab                | 300             |              | 2       | AM     | 68           | 38         | 1.375761283 | 1.020076233         | -0.193007478 | -0.510038116        | -18.96511724              |                           | 1             | 0.259031251  |
| 1308071929 | F3ab                | 300             |              | 1       | AM     | 152          | 107        | 1.451160743 | 0.655443358         | -0.229330757 | 0.384721353         | -35.2915952               |                           | 0.000423821   | 0.518218162  |
| 1308131314 |                     | 300             |              | 2       | AM     | 235          | 161        | 1.877212291 | 1.071689749         | -0.291954064 | 0.148897517         | -24.01538929              |                           | 0.000075157   | 0.866929025  |
| 1308131732 |                     | 300             |              | 1       | AM     | 371          | 262        | 1.701378561 | 1.209591991         | -0.33110299  | 0.306159467         | -26.39646279              |                           | 0.000000249   | 0.018102793  |
| 1309012053 |                     | 300             |              | 2       | MF     | 75           | 51         | 1.90257267  | 0.464061356         | -0.252760625 | 0.442459072         | -46.90476191              |                           | 0.00017951    | 1            |
| 1309051601 | F2f                 | 300             |              | 2       | MF     | 222          | 145        | 1.955009282 | 1.257863679         | -0.453104128 | 0.537986762         | -38.74969295              |                           | 0.000000002   | 0.005761279  |
| 1309061507 |                     | 300             |              | 2       | MF     | 422          | 275        | 2.575029573 | 2.003081902         | -0.55485854  | -0.170614248        | -17.02972384              |                           | 0.000000306   | 0.011291782  |
| 1309071812 |                     | 300             |              | 2       | MF     | 119          | 67         | 1.864198193 | 0.653828851         | -0.69626231  | 0.593908551         | -55.353902                |                           | 0.000000002   | 0.050734755  |
| 1309091051 |                     | 300             |              | 2       | MF     | 20           | 14         | Inf         | Inf                 | #NAME?       | Inf                 | -37.5                     |                           | 0.2           | 0.496503497  |
| 1309091145 |                     | 300             |              | 2       | MF     | 42           | 24         | 1.720498203 | 0.047466993         | -0.474928635 | -0.34237286         | -26.62337662              |                           | 0.084155598   | 0.230917874  |
| 1309101346 |                     | 300             |              | 2       | MF     | 184          | 129        | 2.500065163 | 1.303646546         | -0.072691111 | -0.257136145        | 6.5625                    |                           | 0.000008988   | 0.376767668  |
| 1309171637 |                     | 300             |              | 2       | MF     | 104          | 74         | 2.403206433 | 1.722022725         | -0.558257811 | 0.206559162         | -21.71945701              |                           | 0.003865381   | 0.281446625  |
| 1309211649 |                     | 300             |              | 2       | MF     | 19           | 18         | 0.914704517 | 0.927860225         | -0.108596563 | 0.603640411         | -26.98412698              |                           | 0.357517483   | 0.595588235  |

| Session    | Figure | Current $\mu$ A | Notes            | Subject | Target | #Trials_noMS | #Trials_MS | d(S.D)      | d(S_MSC02.D_MSC02) | c(S.D)       | c(S_MSC02.D_MSC02) | effect-size_1%(S_MSC02-S) | effect-size_1%(D_MSC02-D) | P(S_MSC02-S) | P(D_MSC02-D) |
|------------|--------|-----------------|------------------|---------|--------|--------------|------------|-------------|--------------------|--------------|--------------------|---------------------------|---------------------------|--------------|--------------|
| 1309221807 |        | 300             |                  | 2       | MF     | 193          | 120        | 2.155107069 | 1.82383731         | -0.268709131 | 0.032750936        | -10.05462615              | 3.688853248               | 0.082891797  | 0.670392988  |
| 1309241404 |        | 300             |                  | 2       | MF     | 71           | 51         | 2.630459159 | 1.875879435        | -0.453595459 | -0.029481849       | -12.82051282              | 1.262626263               | 0.181502388  | 1            |
| 1309241541 |        | 300             |                  | 2       | MF     | 27           | 20         | Inf         | 1.227097233        | Inf          | -0.294909252       | 10.38961039               | -37.5                     | 0.62254902   | 0.024347826  |
| 1208031412 | S9b    | 0               | muscimol, v13    | 1       | AF     | 456          | 1230       | 1.334405959 | 1.299552727        | -0.095739618 | 0.13784015         | -8.159901092              | 6.838226844               | 0.026174243  | 0.043820568  |
| 1209111549 | S9a    | 0               | muscimol, v20    | 1       | AM     | 357          | 1490       | 0.491839513 | 0.713217724        | -0.428569994 | -0.309698957       | -0.260718424              | 9.117125111               | 1            | 0.058693545  |
| 1210081418 | S8b    | 100             | 500ms dualMS     | 1       | AM     | 468          | 442        | 0.775377968 | 0.587022768        | -0.162229218 | -0.460915581       | 6.589129678               | -15.56631776              | 0.10685076   | 0.004222122  |
| 1211021506 | S8b    | 300             | 300ms dualMS     | 1       | AM     | 1193         | 1190       | 1.452512756 | 0.799370481        | 0.259157781  | -0.304132036       | 7.944138258               | -29.97273776              | 0.003496238  | 0            |
| 1302131221 | F4c    | 300             | objects          | 1       | AM     | 1253         | 421        | 2.939580468 | 2.547262118        | -0.076845037 | 0.424133334        | -13.68265881              | 3.704206242               | 0.00000292   | 0.109259648  |
| 1304021204 | F4e    | 300             | objects          | 2       | AM     | 475          | 213        | 2.80151862  | 2.745377517        | 0.131238348  | -0.010305369       | 1.879432624               | -2.377695526              | 0.695079514  | 0.490378957  |
| 1302131221 | S4ac   | 300             | nonround objects | 1       | AM     | 363          | 118        | 2.948528967 | 2.62623652         | -0.181459254 | 0.1704216          | -7.769338959              | 2.907369844               | 0.035210958  | 1            |
| 1304021204 | S4bd   | 300             | nonround objects | 2       | AM     | 131          | 59         | 3.144937552 | 1.993971266        | 0.06007919   | -0.455590548       | -0.79533404               | -24.28355958              | 1            | 0.021936345  |

**Supplementary Table 2: Selected statistics for the performance bars shown in figures 2, 4, 5, 6, 8, 9, as well as supplementary figures 1, 2, 4, 5, 7, 8, 9; column four indicates which figure panel a row corresponds to. Same identity trial aggregates are indicated by the S string, different identity trial aggregates by the D string. Microstimulation during Cue2 is indicated by the MSC string, effect size: percentage points difference for correct trials between trials with and without microstimulation, P denotes the significance of the effect size (Fisher's exact test), a value of 0 denotes < 0.000000005. Column starting with N- give the number of trials in each of the different trial types. Experiments with more than 1 stimulus category are stacked vertically to keep the table size constant.**

| Session    | Subject | Target | Figure | Category                | Effect Size [%] (S_MSC-S) | Effect Size [%] (D_MSC-D) | P (S_MSC-S) | P (D_MSC-D) | N-Same Hit | N-Same Miss | N-Diff Hit | N-Diff Miss | N-Same_MSC Hit | N-Same_MSC Miss | N-Diff_MSC Hit | N-Diff_MSC Miss |
|------------|---------|--------|--------|-------------------------|---------------------------|---------------------------|-------------|-------------|------------|-------------|------------|-------------|----------------|-----------------|----------------|-----------------|
| 1302131221 | 1       | AM     | F2a    | 32faces                 | -77.56848668              | 27.86954151               | 0           | 0           | 613        | 57          | 497        | 249         | 33             | 204             | 223            | 13              |
| 1303311208 | 2       | AM     | F2b    | 32faces                 | -65.31720366              | 27.01907064               | 0           | 0           | 332        | 82          | 283        | 142         | 36             | 206             | 205            | 14              |
| 1302011544 | 1       | ML     | F2c    | 32faces                 | -74.62511202              | 18.63787504               | 0           | 0           | 736        | 94          | 683        | 165         | 34             | 208             | 242            | 2               |
| 1304161430 | 2       | ML     | F2d    | 32faces                 | -67.22033898              | 12.54295533               | 0           | 0.002294058 | 165        | 12          | 165        | 33          | 26             | 74              | 93             | 4               |
| 1302161303 | 1       | AL     | F2e    | 32faces                 | -68.57680251              | 22.42553192               | 0           | 0.000010172 | 236        | 39          | 187        | 88          | 15             | 72              | 85             | 9               |
| 1309051601 | 2       | MF     | F2f    | 32faces                 | -38.74969295              | 17.83783784               | 0.000000002 | 0.005761279 | 109        | 9           | 70         | 30          | 37             | 32              | 65             | 9               |
| 1302151316 | 1       | AF     | F2g    | 32faces                 | -44.58882611              | 12.93752883               | 0           | 0           | 561        | 88          | 540        | 92          | 113            | 157             | 243            | 4               |
| 1304172302 | 1       | OUTFP  | F4a    | 32faces                 | -4.761904762              | 0                         | 0.6843922   | 1           | 57         | 6           | 52         | 13          | 18             | 3               | 20             | 5               |
| 1302131221 | 1       | AM     | F4c    | 28objects               | -13.68265881              | 3.704206242               | 0.000000292 | 0.109259648 | 539        | 35          | 505        | 45          | 146            | 36              | 192            | 9               |
| 1302131221 | 1       | AM     | F4d    | 32faces                 | -77.56848668              | 27.86954151               | 0           | 0           | 613        | 57          | 497        | 249         | 33             | 204             | 223            | 13              |
| 1304021204 | 2       | AM     | F4e    | 28objects               | 1.879432624               | -2.377695526              | 0.695079514 | 0.490378957 | 211        | 24          | 224        | 15          | 99             | 9               | 95             | 9               |
| 1304021204 | 2       | AM     | F4f    | 32faces                 | -62.90584416              | 36.89104788               | 0           | 0.000001194 | 101        | 11          | 66         | 65          | 18             | 48              | 48             | 7               |
| 1307181509 | 1       | AM     | F5ac   | 3faces                  | -52.55717256              | 20.2467344                | 0.000000075 | 0.09515333  | 57         | 8           | 28         | 25          | 13             | 24              | 19             | 7               |
| 1307181509 | 1       | AM     | F5ac   | 3apples                 | -29.03225807              | 16.86567164               | 0.003116073 | 0.140835948 | 54         | 8           | 49         | 18          | 18             | 13              | 18             | 2               |
| 1307181509 | 1       | AM     | F5ac   | 3citrus fruits          | -16.24242424              | 21.47335423               | 0.056075057 | 0.038729844 | 46         | 4           | 45         | 21          | 25             | 8               | 26             | 3               |
| 1307181509 | 1       | AM     | F5ac   | 3pots                   | -11.28117914              | 13.63636364               | 0.190729057 | 0.053592911 | 45         | 4           | 57         | 9           | 29             | 7               | 28             | 0               |
| 1307181509 | 1       | AM     | F5ac   | 3clocks                 | -9.97983871               | 3.86996904                | 0.196738528 | 0.727205124 | 58         | 6           | 45         | 6           | 25             | 6               | 35             | 3               |
| 1307181509 | 1       | AM     | F5bd   | 32faces                 | -52.1773399               | 23.03517152               | 0           | 0.000000646 | 179        | 24          | 130        | 66          | 45             | 80              | 126            | 15              |
| 1303271654 | 1       | AM     | F6ac   | 4face_cartoons          | -70.9445347               | 30.3030303                | 0           | 0.000454005 | 130        | 9           | 77         | 44          | 7              | 24              | 31             | 2               |
| 1303271654 | 1       | AM     | F6ac   | 4face_linedrawings      | -32.57452575              | 20.13184584               | 0.000006189 | 0.027343378 | 123        | 12          | 79         | 37          | 24             | 17              | 30             | 4               |
| 1303271654 | 1       | AM     | F6ac   | 4face_moonneys          | -40.40977147              | 13.8962963                | 0.000000324 | 0.079107836 | 112        | 23          | 103        | 22          | 20             | 27              | 26             | 1               |
| 1303271654 | 1       | AM     | F6ac   | 4face_silhouettes       | -51.59646739              | 13.65079365               | 0.00000173  | 0.101263743 | 105        | 23          | 79         | 26          | 7              | 16              | 32             | 4               |
| 1303271654 | 1       | AM     | F6bd   | 32faces                 | -68                       | 13.81147541               | 0.000000005 | 0.093591932 | 48         | 12          | 48         | 13          | 3              | 22              | 37             | 3               |
| 1307291233 | 2       | AM     | F6eg   | 4face_cartoons          | -12.5                     | 26.93602694               | 0.109975768 | 0.018442576 | 53         | 3           | 36         | 30          | 23             | 5               | 22             | 5               |
| 1307291233 | 2       | AM     | F6eg   | 4face_linedrawings      | -10.3021978               | -1.786600496              | 0.275434372 | 1           | 51         | 5           | 41         | 24          | 21             | 5               | 19             | 12              |
| 1307291233 | 2       | AM     | F6eg   | 4face_moonneys          | -34.96462264              | 12.06896552               | 0.000112069 | 0.09021437  | 50         | 3           | 51         | 7           | 19             | 13              | 30             | 0               |
| 1307291233 | 2       | AM     | F6eg   | 4face_silhouettes       | -26.84729064              | 34.572697                 | 0.000407034 | 0.000628709 | 57         | 1           | 30         | 23          | 20             | 8               | 31             | 3               |
| 1307291233 | 2       | AM     | F6fh   | 32faces                 | -30.96381506              | 18.36213669               | 0           | 0.000180501 | 227        | 15          | 147        | 81          | 93             | 55              | 111            | 23              |
| 1304031338 | 1       | AM     | F8ac   | 4house_linedrawings     | -49.07888522              | 27.37967914               | 0.000002958 | 0.002981192 | 61         | 12          | 54         | 31          | 10             | 19              | 30             | 3               |
| 1304031338 | 1       | AM     | F8ac   | 4house_cartoons         | -47.98534799              | 37.37824675               | 0.00000007  | 0.000151311 | 69         | 9           | 41         | 36          | 17             | 25              | 29             | 3               |
| 1304031338 | 1       | AM     | F8ac   | 4house_silhouettes      | -41.86909582              | 22.88477035               | 0.000011629 | 0.010073837 | 63         | 13          | 52         | 21          | 16             | 23              | 32             | 2               |
| 1304031338 | 1       | AM     | F8ac   | 4face_moonneys          | -65.71428571              | 20.25089606               | 0           | 0.012855399 | 64         | 6           | 69         | 24          | 9              | 26              | 34             | 2               |
| 1304031338 | 1       | AM     | F8ac   | 4face_moonneys_inverted | -26.55172414              | 24.83552632               | 0.000054788 | 0.008489147 | 84         | 3           | 50         | 26          | 28             | 12              | 29             | 3               |
| 1304031338 | 1       | AM     | F8bd   | 32faces                 | -68.997669                | 23.37662338               | 0           | 0.001446435 | 68         | 10          | 59         | 18          | 8              | 36              | 31             | 0               |
| 1302141229 | 1       | AM     | F9     | 32faces                 | -80.20882772              | 19.66522839               | 0           | 0           | 380        | 50          | 371        | 99          | 12             | 135             | 141            | 2               |
| 1303271654 | 1       | AM     | F9     | 4face_cartoons          | -70.9445347               | 30.3030303                | 0           | 0.000454005 | 130        | 9           | 77         | 44          | 7              | 24              | 31             | 2               |
| 1304031338 | 1       | AM     | F9     | 4face_moonneys          | -65.71428571              | 20.25089606               | 0           | 0.012855399 | 64         | 6           | 69         | 24          | 9              | 26              | 34             | 2               |
| 1303271654 | 1       | AM     | F9     | 4face_silhouettes       | -51.59646739              | 13.65079365               | 0.00000173  | 0.101263743 | 105        | 23          | 79         | 26          | 7              | 16              | 32             | 4               |
| 1304031338 | 1       | AM     | F9     | 4house_linedrawings     | -49.07888522              | 27.37967914               | 0.000002958 | 0.002981192 | 61         | 12          | 54         | 31          | 10             | 19              | 30             | 3               |
| 1304031338 | 1       | AM     | F9     | 4house_cartoons         | -47.98534799              | 37.37824675               | 0.00000007  | 0.000151311 | 69         | 9           | 41         | 36          | 17             | 25              | 29             | 3               |
| 1304031338 | 1       | AM     | F9     | 4house_silhouettes      | -41.86909582              | 22.88477035               | 0.000011629 | 0.010073837 | 63         | 13          | 52         | 21          | 16             | 23              | 32             | 2               |
| 1303271654 | 1       | AM     | F9     | 4face_linedrawings      | -32.57452575              | 20.13184584               | 0.000006189 | 0.027343378 | 123        | 12          | 79         | 37          | 24             | 17              | 30             | 4               |

| Session    | Subject | Target | Figure | Category               | Effect Size [%] (S_MSC-S) | Effect Size [%] (D_MSC-D) | P (S_MSC-S) | P (D_MSC-D) | N-Same Hit | N-Same Miss | N-Diff Hit | N-Diff Miss | N-Same_MSC Hit | N-Same_MSC Miss | N-Diff_MSC Hit | N-Diff_MSC Miss |
|------------|---------|--------|--------|------------------------|---------------------------|---------------------------|-------------|-------------|------------|-------------|------------|-------------|----------------|-----------------|----------------|-----------------|
| 1307181509 | 1       | AM     | F9     | 3apples                | -29.03225807              | 16.86567164               | 0.003116073 | 0.140835948 | 54         | 8           | 49         | 18          | 18             | 13              | 18             | 2               |
| 1307181509 | 1       | AM     | F9     | 3citrus fruits         | -16.24242424              | 21.47335423               | 0.056075057 | 0.038729844 | 46         | 4           | 45         | 21          | 25             | 8               | 26             | 3               |
| 1307181509 | 1       | AM     | F9     | 3spots                 | -11.28117914              | 13.63636364               | 0.190729057 | 0.053592911 | 45         | 4           | 57         | 9           | 29             | 7               | 28             | 0               |
| 1307181509 | 1       | AM     | F9     | 3clocks                | -9.97983871               | 3.86996904                | 0.196738528 | 0.727205124 | 58         | 6           | 45         | 6           | 25             | 6               | 35             | 3               |
| 1302131221 | 1       | AM     | F9     | 14nonround_objects     | -7.769338959              | 2.907369844               | 0.035210958 | 1           | 214        | 11          | 92         | 10          | 69             | 10              | 27             | 2               |
| 1303271654 | 1       | AM     | S1a    | 32faces                | -49.35897436              | 7.384910486               | 0           | 0.195888465 | 128        | 28          | 123        | 13          | 17             | 35              | 45             | 1               |
| 1303271654 | 1       | AM     | S1b    | 32faces                | -68                       | 13.81147541               | 0.000000005 | 0.093591932 | 48         | 12          | 48         | 13          | 3              | 22              | 37             | 3               |
| 1302141229 | 1       | AM     | S1c    | 32faces                | -13.2664437               | 1.124422026               | 0.038950037 | 1           | 136        | 20          | 121        | 35          | 34             | 12              | 48             | 13              |
| 1302141229 | 1       | AM     | S1d    | 32faces                | -80.20882772              | 19.66522839               | 0           | 0           | 380        | 50          | 371        | 99          | 12             | 135             | 141            | 2               |
| 1304171554 | 2       | AM     | S1e    | 32faces                | -57.12121212              | 15.97262952               | 0           | 0.022418098 | 99         | 9           | 68         | 25          | 19             | 36              | 49             | 6               |
| 1304171554 | 2       | AM     | S1f    | 32faces                | -91.8049271               | 34.51327434               | 0           | 0.000000001 | 112        | 5           | 74         | 39          | 2              | 49              | 67             | 0               |
| 1304111326 | 2       | AM     | S1g    | 32faces                | 0                         | -17.46031746              | 1           | 0.55        | 10         | 2           | 8          | 1           | 5              | 1               | 5              | 2               |
| 1304111326 | 2       | AM     | S1h    | 32faces                | -84.65423465              | 26.44300144               | 0           | 0.000000841 | 129        | 14          | 109        | 45          | 3              | 51              | 70             | 2               |
| 1304161430 | 2       | ML     | S1i    | 32faces                | -38.2647386               | 9.412650602               | 0.000007134 | 0.228765611 | 81         | 6           | 70         | 13          | 17             | 14              | 30             | 2               |
| 1304161430 | 2       | ML     | S1j    | 32faces                | -67.22033898              | 12.54295533               | 0           | 0.002294058 | 165        | 12          | 165        | 33          | 0              | 74              | 93             | 4               |
| 1304161430 | 2       | ML     | S1k    | 32faces                | -60.57316065              | 13.77684652               | 0           | 0.001435869 | 174        | 17          | 152        | 32          | 29             | 66              | 80             | 3               |
| 1307190955 | 1       | AM     | S2a    | 3faces                 | -23.64230298              | 14.00076717               | 0.018489572 | 0.207010019 | 62         | 17          | 44         | 35          | 17             | 14              | 23             | 10              |
| 1307190955 | 1       | AM     | S2a    | 3apples                | -18.52564103              | 10.07326007               | 0.013462203 | 0.422625356 | 71         | 7           | 59         | 19          | 29             | 11              | 24             | 4               |
| 1307190955 | 1       | AM     | S2a    | 3citrus fruits         | -0.421200421              | 19.63294921               | 1           | 0.075545628 | 69         | 8           | 42         | 29          | 33             | 4               | 26             | 7               |
| 1307190955 | 1       | AM     | S2a    | 3spots                 | -3.147128245              | -4.812030075              | 0.733437275 | 0.448120968 | 74         | 8           | 66         | 4           | 27             | 4               | 34             | 4               |
| 1307190955 | 1       | AM     | S2a    | 3clocks                | -8.760683761              | 12.17320261               | 0.138205726 | 0.136035838 | 74         | 4           | 59         | 13          | 31             | 5               | 32             | 2               |
| 1307190955 | 1       | AM     | S2a    | 32faces                | -30.70175439              | 19                        | 0.001294164 | 0.052377865 | 55         | 11          | 33         | 17          | 20             | 18              | 34             | 6               |
| 1307181509 | 1       | AM     | S2b    | 3faces                 | -52.55717256              | 20.2467344                | 0.000000075 | 0.09515333  | 57         | 8           | 28         | 25          | 13             | 24              | 19             | 7               |
| 1307181509 | 1       | AM     | S2b    | 3apples                | -29.03225807              | 16.86567164               | 0.003116073 | 0.140835948 | 54         | 8           | 49         | 18          | 18             | 13              | 18             | 2               |
| 1307181509 | 1       | AM     | S2b    | 3citrus fruits         | -16.24242424              | 21.47335423               | 0.056075057 | 0.038729844 | 46         | 4           | 45         | 21          | 25             | 8               | 26             | 3               |
| 1307181509 | 1       | AM     | S2b    | 3spots                 | -11.28117914              | 13.63636364               | 0.190729057 | 0.053592911 | 45         | 4           | 57         | 9           | 29             | 7               | 28             | 0               |
| 1307181509 | 1       | AM     | S2b    | 3clocks                | -9.97983871               | 3.86996904                | 0.196738528 | 0.727205124 | 58         | 6           | 45         | 6           | 25             | 6               | 35             | 3               |
| 1307181509 | 1       | AM     | S2b    | 32faces                | -52.1773399               | 23.03517152               | 0           | 0.000000646 | 179        | 24          | 130        | 66          | 45             | 80              | 126            | 15              |
| 1304172302 | 1       | OUTFP  | S2c    | 3faces                 | -8.378970427              | -3.16017316               | 0.461256349 | 0.815604896 | 56         | 27          | 51         | 19          | 13             | 9               | 23             | 10              |
| 1304172302 | 1       | OUTFP  | S2c    | 3apples                | -12.51457443              | 3.090623363               | 0.033330896 | 1           | 80         | 3           | 66         | 17          | 26             | 5               | 19             | 4               |
| 1304172302 | 1       | OUTFP  | S2c    | 3citrus fruits         | -19.34883721              | 22.33766234               | 0.008331403 | 0.020074961 | 82         | 4           | 51         | 26          | 19             | 6               | 31             | 4               |
| 1304172302 | 1       | OUTFP  | S2c    | 3spots                 | 1.162790698               | -2.662037037              | 1           | 0.392243103 | 85         | 1           | 95         | 1           | 22             | 0               | 26             | 1               |
| 1304172302 | 1       | OUTFP  | S2c    | 3clocks                | -3.603254552              | -2.33384069               | 0.687115149 | 0.469090909 | 83         | 6           | 72         | 1           | 26             | 3               | 26             | 1               |
| 1304172302 | 1       | OUTFP  | S2c    | 32faces                | -4.761904762              | 0                         | 0.6843922   | 1           | 57         | 6           | 52         | 13          | 18             | 3               | 20             | 5               |
| 1302131221 | 1       | AM     | S4ac   | 14nonround_objects     | -7.769338959              | 2.907369844               | 0.035210958 | 1           | 214        | 11          | 92         | 10          | 69             | 10              | 27             | 2               |
| 1304021204 | 2       | AM     | S4bd   | 14nonround_objects     | -0.79533404               | -24.28355958              | 1           | 0.021936345 | 86         | 6           | 37         | 2           | 38             | 3               | 12             | 5               |
| 1304171554 | 2       | AM     | S5ac   | 4house_line drawings   | -0.679347826              | 2.727272727               | 1           | 0.769278856 | 63         | 6           | 14         | 56          | 29             | 3               | 5              | 17              |
| 1304171554 | 2       | AM     | S5ac   | 4house_cartoons        | -25.71428571              | 24.70588235               | 0.008209015 | 0.027990954 | 54         | 9           | 24         | 44          | 18             | 12              | 18             | 12              |
| 1304171554 | 2       | AM     | S5ac   | 4house_silhouettes     | -17.59142497              | 36.80555556               | 0.008401914 | 0.000553563 | 60         | 1           | 32         | 40          | 21             | 5               | 26             | 6               |
| 1304171554 | 2       | AM     | S5ac   | 4face_mooneys          | -68.36065574              | 12.29379419               | 0           | 0.053963901 | 60         | 1           | 57         | 10          | 9              | 21              | 37             | 1               |
| 1304171554 | 2       | AM     | S5ac   | 4face_mooneys_inverted | -43.67201426              | 25.58775287               | 0.000016649 | 0.004425847 | 56         | 10          | 42         | 17          | 14             | 20              | 30             | 1               |
| 1304171554 | 2       | AM     | S5bd   | 32faces                | -91.8049271               | 34.51327434               | 0           | 0.000000001 | 112        | 5           | 74         | 39          | 2              | 49              | 67             | 0               |
| 1302011544 | 1       | ML     | S7a    | 32faces MSC10          | -20.19220852              | -1.403379983              | 0           | 0.614406579 | 736        | 94          | 683        | 165         | 176            | 81              | 239            | 63              |
| 1302011544 | 1       | ML     | S7a    | 32faces MSC02          | -74.62511202              | 18.63787504               | 0           | 0           | 736        | 94          | 683        | 165         | 34             | 208             | 242            | 2               |
| 1302011544 | 1       | ML     | S7a    | 32faces MSC12          | -31.31620823              | -6.936504875              | 0           | 0.016535928 | 736        | 94          | 683        | 165         | 152            | 113             | 198            | 71              |
| 1302131221 | 1       | AM     | S7b    | 32faces_200ms MSC10    | -19.83261829              | 5.900538608               | 0           | 0.101886215 | 613        | 57          | 497        | 249         | 177            | 70              | 161            | 61              |
| 1302131221 | 1       | AM     | S7b    | 32faces_200ms MSC02    | -77.56848668              | 27.86954151               | 0           | 0           | 613        | 57          | 497        | 249         | 33             | 204             | 223            | 13              |
| 1302131221 | 1       | AM     | S7b    | 32faces_200ms MSC12    | -17.17960473              | 9.637698604               | 0.000080287 | 0.000000852 | 613        | 57          | 497        | 249         | 203            | 45              | 133            | 136             |
| 1303311208 | 2       | AM     | S7c    | 32faces MSC10          | -20.36417689              | 7.578431373               | 0.000015046 | 0.121365772 | 332        | 82          | 283        | 142         | 70             | 47              | 89             | 31              |
| 1303311208 | 2       | AM     | S7c    | 32faces MSC02          | -65.31720366              | 27.01907064               | 0           | 0           | 332        | 82          | 283        | 142         | 36             | 206             | 205            | 14              |

| Session    | Subject | Target | Figure | Category           | Effect Size [%] (S_MSC-S) | Effect Size [%] (D_MSC-D) | P (S_MSC-S) | P (D_MSC-D) | N-Same Hit | N-Same Miss | N-Diff Hit | N-Diff Miss | N-Same_MSC Hit | N-Same_MSC Miss | N-Diff_MSC Hit | N-Diff_MSC Miss |
|------------|---------|--------|--------|--------------------|---------------------------|---------------------------|-------------|-------------|------------|-------------|------------|-------------|----------------|-----------------|----------------|-----------------|
| 1303311208 | 2       | AM     | S7c    | 32faces MSC12      | -9.438519734              | 1.636063771               | 0.047031133 | 0.818445011 | 332        | 82          | 283        | 142         | 75             | 31              | 73             | 34              |
| 1302131221 | 1       | AM     | S7d    | 32faces_50ms MSC10 | -10.35590707              | 4.757199322               | 0.016296025 | 0.436316458 | 257        | 32          | 213        | 95          | 77             | 21              | 68             | 24              |
| 1302131221 | 1       | AM     | S7d    | 32faces_50ms MSC02 | -40.85041256              | 24.52836637               | 0           | 0.000000284 | 257        | 32          | 213        | 95          | 50             | 54              | 89             | 6               |
| 1302131221 | 1       | AM     | S7d    | 32faces_50ms MSC12 | -24.4828912               | 5.844155844               | 0.000000479 | 0.338535373 | 257        | 32          | 213        | 95          | 58             | 32              | 60             | 20              |
| 1210081418 | 1       | AM     | S8a    | 4faces_3views      | 6.589129678               | -15.56631776              | 0.10685076  | 0.004222122 | 185        | 76          | 109        | 76          | 196            | 57              | 75             | 98              |
| 1211021506 | 1       | AM     | S8b    | 40faces            | 7.944138258               | -29.97273776              | 0.003496238 | 0           | 380        | 179         | 470        | 91          | 432            | 137             | 311            | 267             |
| 1209111549 | 1       | AM     | S9a    | 4faces_3views      | -0.260718424              | 9.117125111               | 1           | 0.058693545 | 162        | 54          | 59         | 79          | 645            | 218             | 305            | 283             |
| 1208031412 | 1       | AF     | S9b    | 16faces_3views     | -8.159901092              | 6.838226844               | 0.026174243 | 0.043820568 | 164        | 47          | 164        | 65          | 416            | 182             | 477            | 131             |

**Supplementary Table 3: Selected statistics for the signal-detection theory measures bars shown in figure 2h; column four indicates which figure panel a row corresponds to. Same identity trial aggregates are indicated by the S\_string, different identity trial aggregates by the D\_string. Microstimulation during Cue2 is indicated by the MSC string; the signal detection measures are given for the detectability of same identities (different identities are effectively treated as noise) without microstimulation (S.D) and with microstimulation (S\_MSC.D\_MSC); P denotes the significance of the effect size (Fisher's exact test) , a value of 0 denotes < 0.000000005. Column starting with N- give the number of trials for all different trial types.**

| Session    | Subject | Target | Category | d' (S.D)    | d' (S_MSC0D_MSC) | Criterion c (S.D) | Criterion c (S_MSC.D_MSC) | P (S_MSC-S) | P (D_MSC-D) | N-Same Hit | N-Same Miss | N-Diff Hit | N-Diff Miss | N-Same MSC Hit | N-Same MSC Miss | N-Diff MSC Hit | N-Diff MSC Miss |
|------------|---------|--------|----------|-------------|------------------|-------------------|---------------------------|-------------|-------------|------------|-------------|------------|-------------|----------------|-----------------|----------------|-----------------|
| 1302131221 | 1       | AM     | 32faces  | 1.801223111 | 0.513693857      | -0.471112831      | 1.340584859               | 0           | 0           | 613        | 57          | 497        | 249         | 33             | 204             | 223            | 13              |
| 1303311208 | 2       | AM     | 32faces  | 1.277114884 | 0.480854723      | -0.209986223      | 1.282192326               | 0           | 0           | 332        | 82          | 283        | 142         | 36             | 206             | 205            | 14              |
| 1302011544 | 1       | ML     | 32faces  | 2.070566448 | 1.321942213      | -0.174125069      | 1.739065271               | 0           | 0           | 736        | 94          | 683        | 165         | 34             | 208             | 242            | 2               |
| 1304161430 | 2       | ML     | 32faces  | 2.459825744 | 1.0931616        | -0.262491306      | 1.189926205               | 0           | 0.002294058 | 165        | 12          | 165        | 33          | 26             | 74              | 93             | 4               |
| 1302161303 | 1       | AL     | 32faces  | 1.539885097 | 0.361516264      | -0.302243749      | 1.125427723               | 0           | 0.000010172 | 236        | 39          | 187        | 88          | 15             | 72              | 85             | 9               |
| 1309051601 | 2       | MF     | 32faces  | 1.955009282 | 1.257863679      | -0.453104128      | 0.537986762               | 0.000000002 | 0.005761279 | 109        | 9           | 70         | 30          | 37             | 32              | 65             | 9               |
| 1302151316 | 1       | AF     | 32faces  | 2.15596015  | 1.933895824      | -0.022354344      | 1.172632834               | 0           | 0           | 561        | 88          | 540        | 92          | 113            | 157             | 243            | 4               |
