# Supplementary material
Source: PubMed Central journal article supplement (PMC8086516)

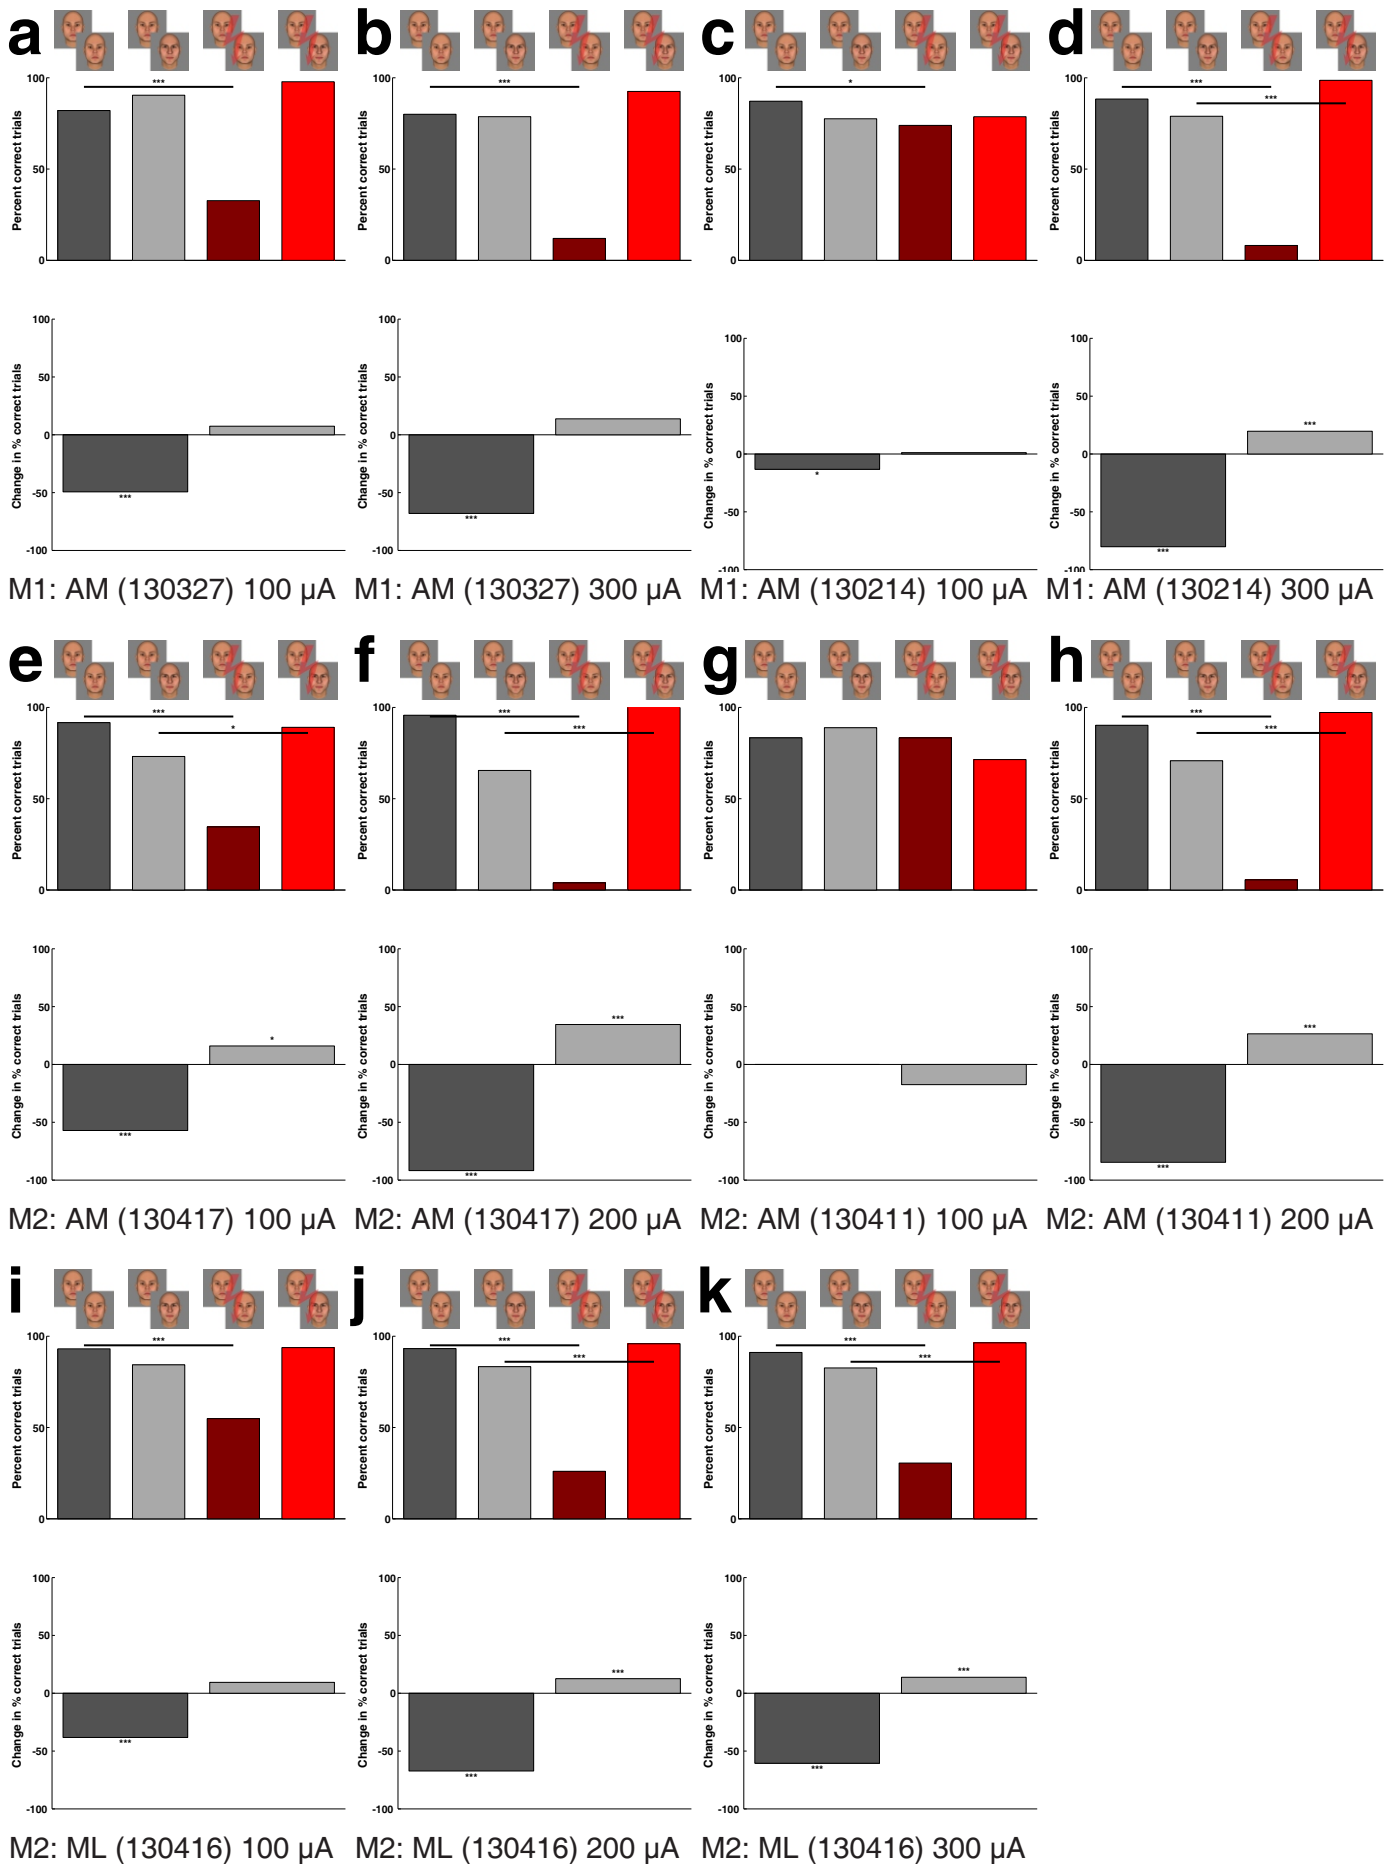

Supplement: NIHMS1697127-supplement-Supplemental_Figure_1.pdf [file NIHMS1697127-supplement-Supplemental_Figure_1.pdf]

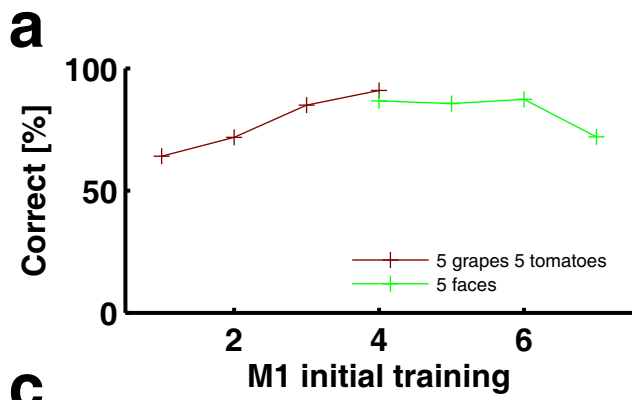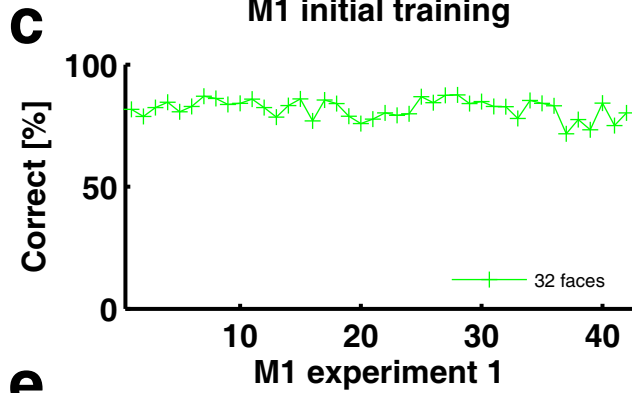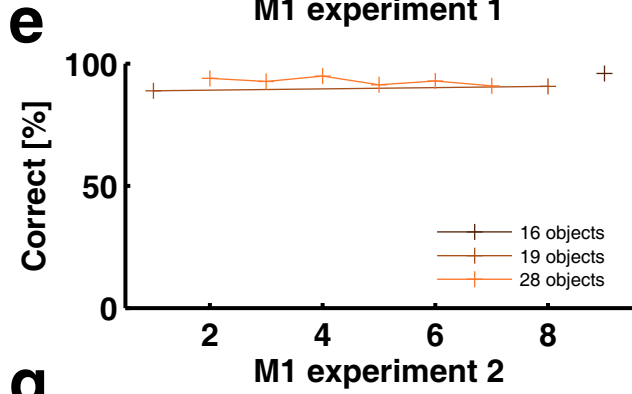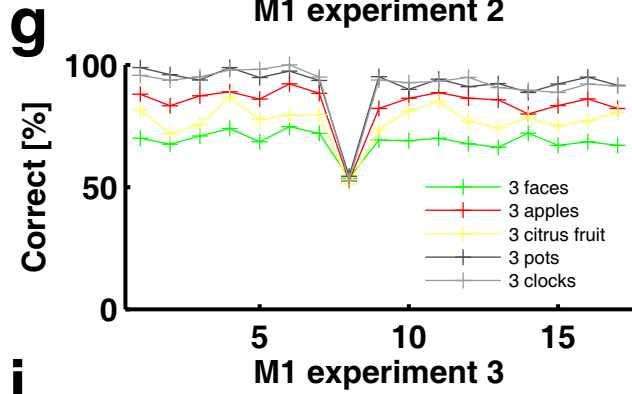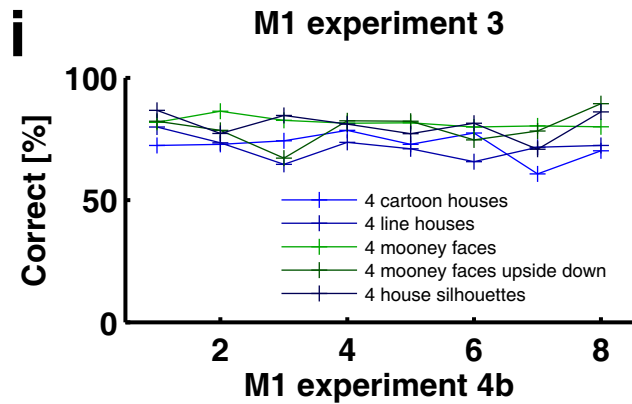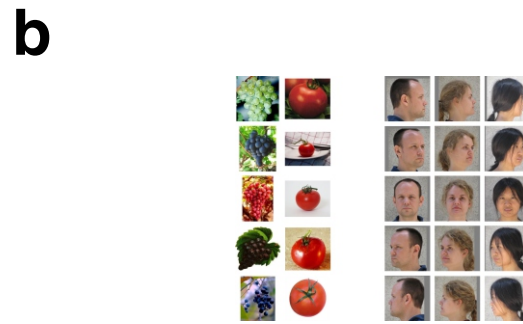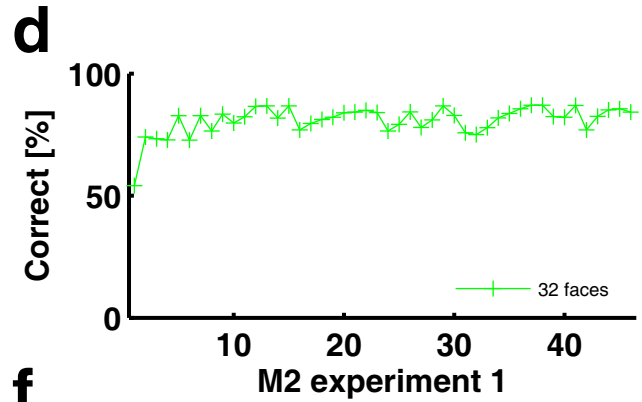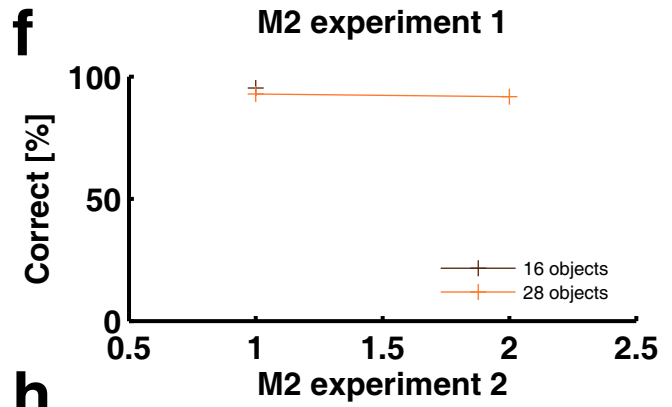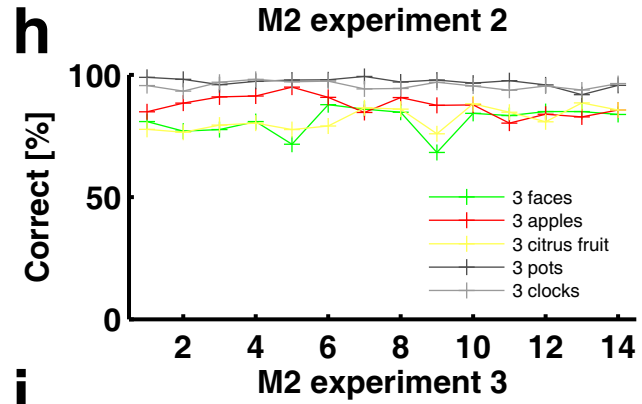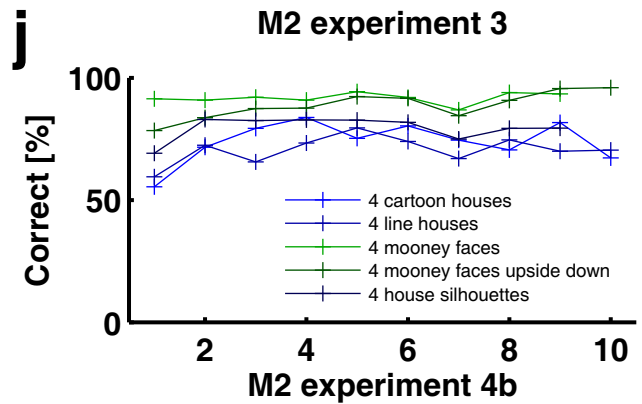

Supplement: NIHMS1697127-supplement-Supplemental_Figure_10.pdf [file NIHMS1697127-supplement-Supplemental_Figure_10.pdf]

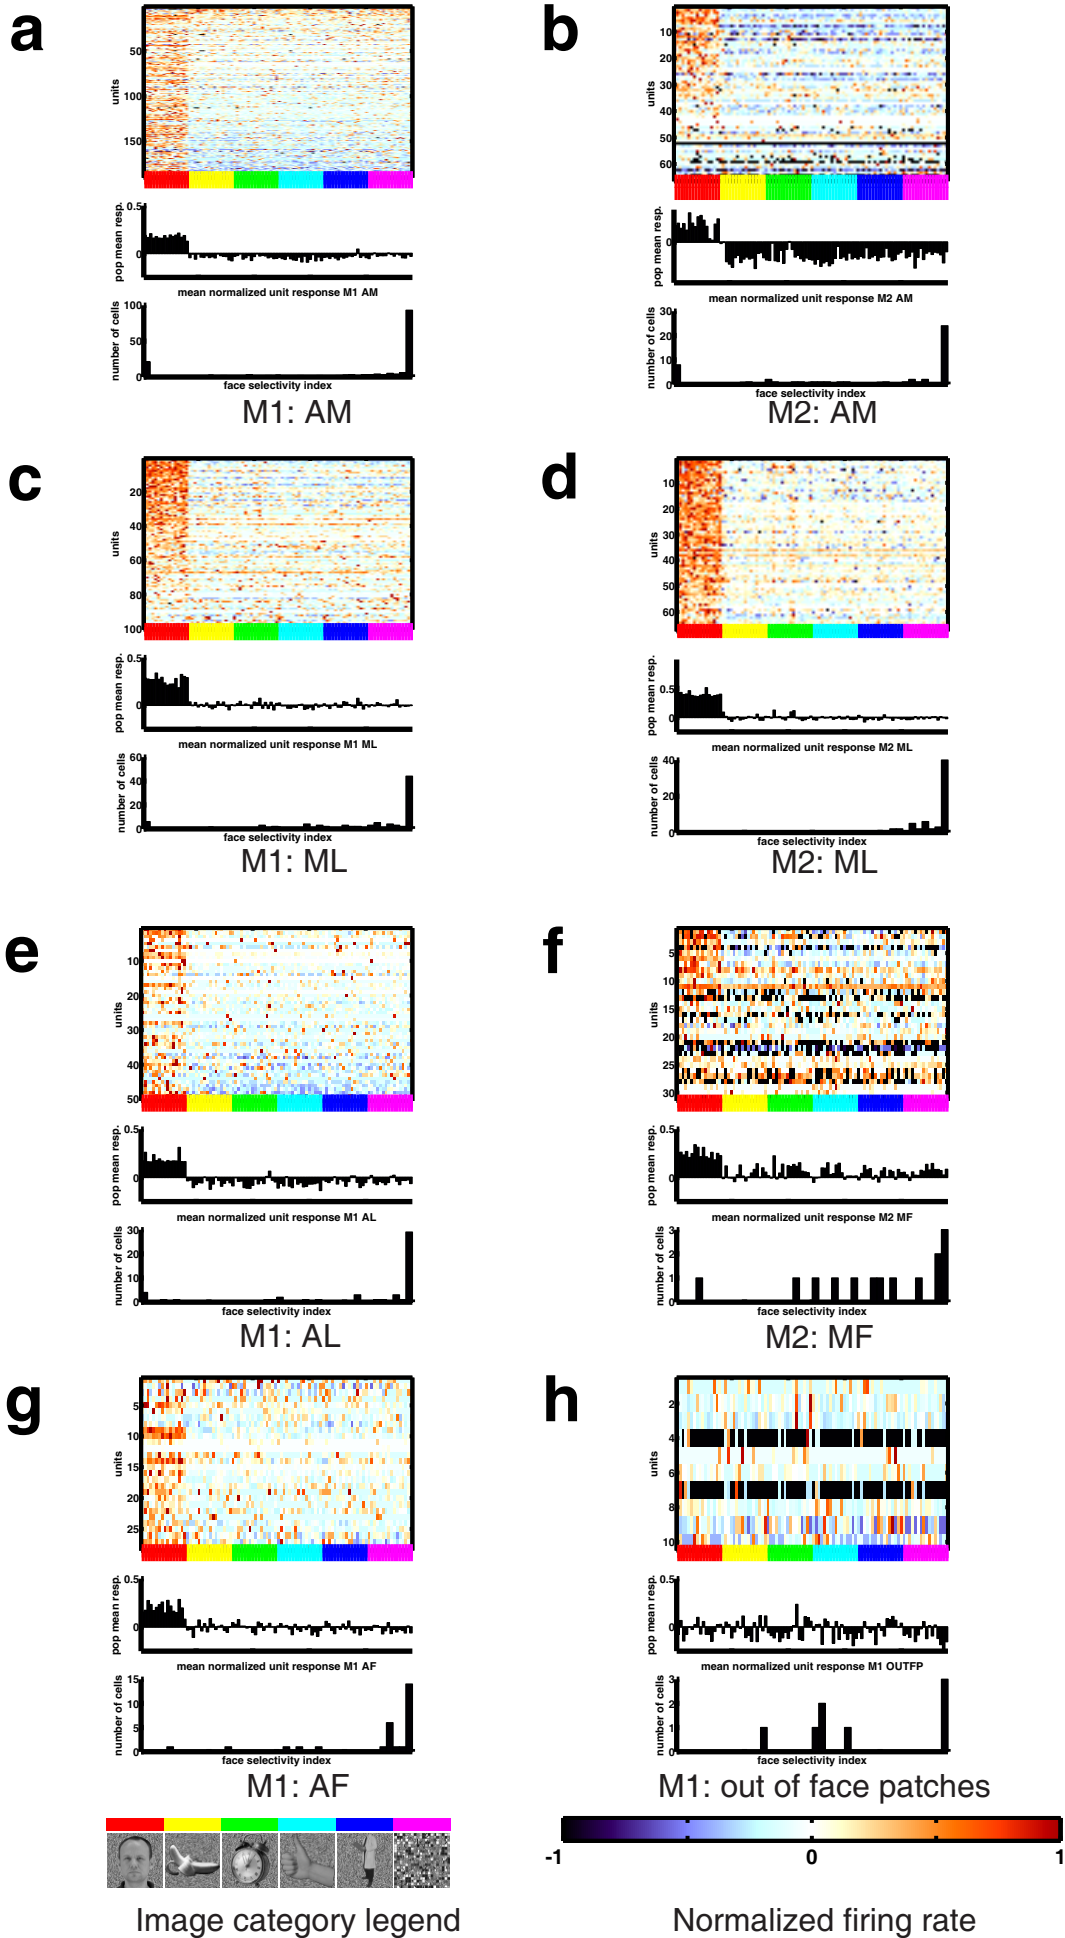

Supplement: NIHMS1697127-supplement-Supplemental_Figure_11.pdf [file NIHMS1697127-supplement-Supplemental_Figure_11.pdf]

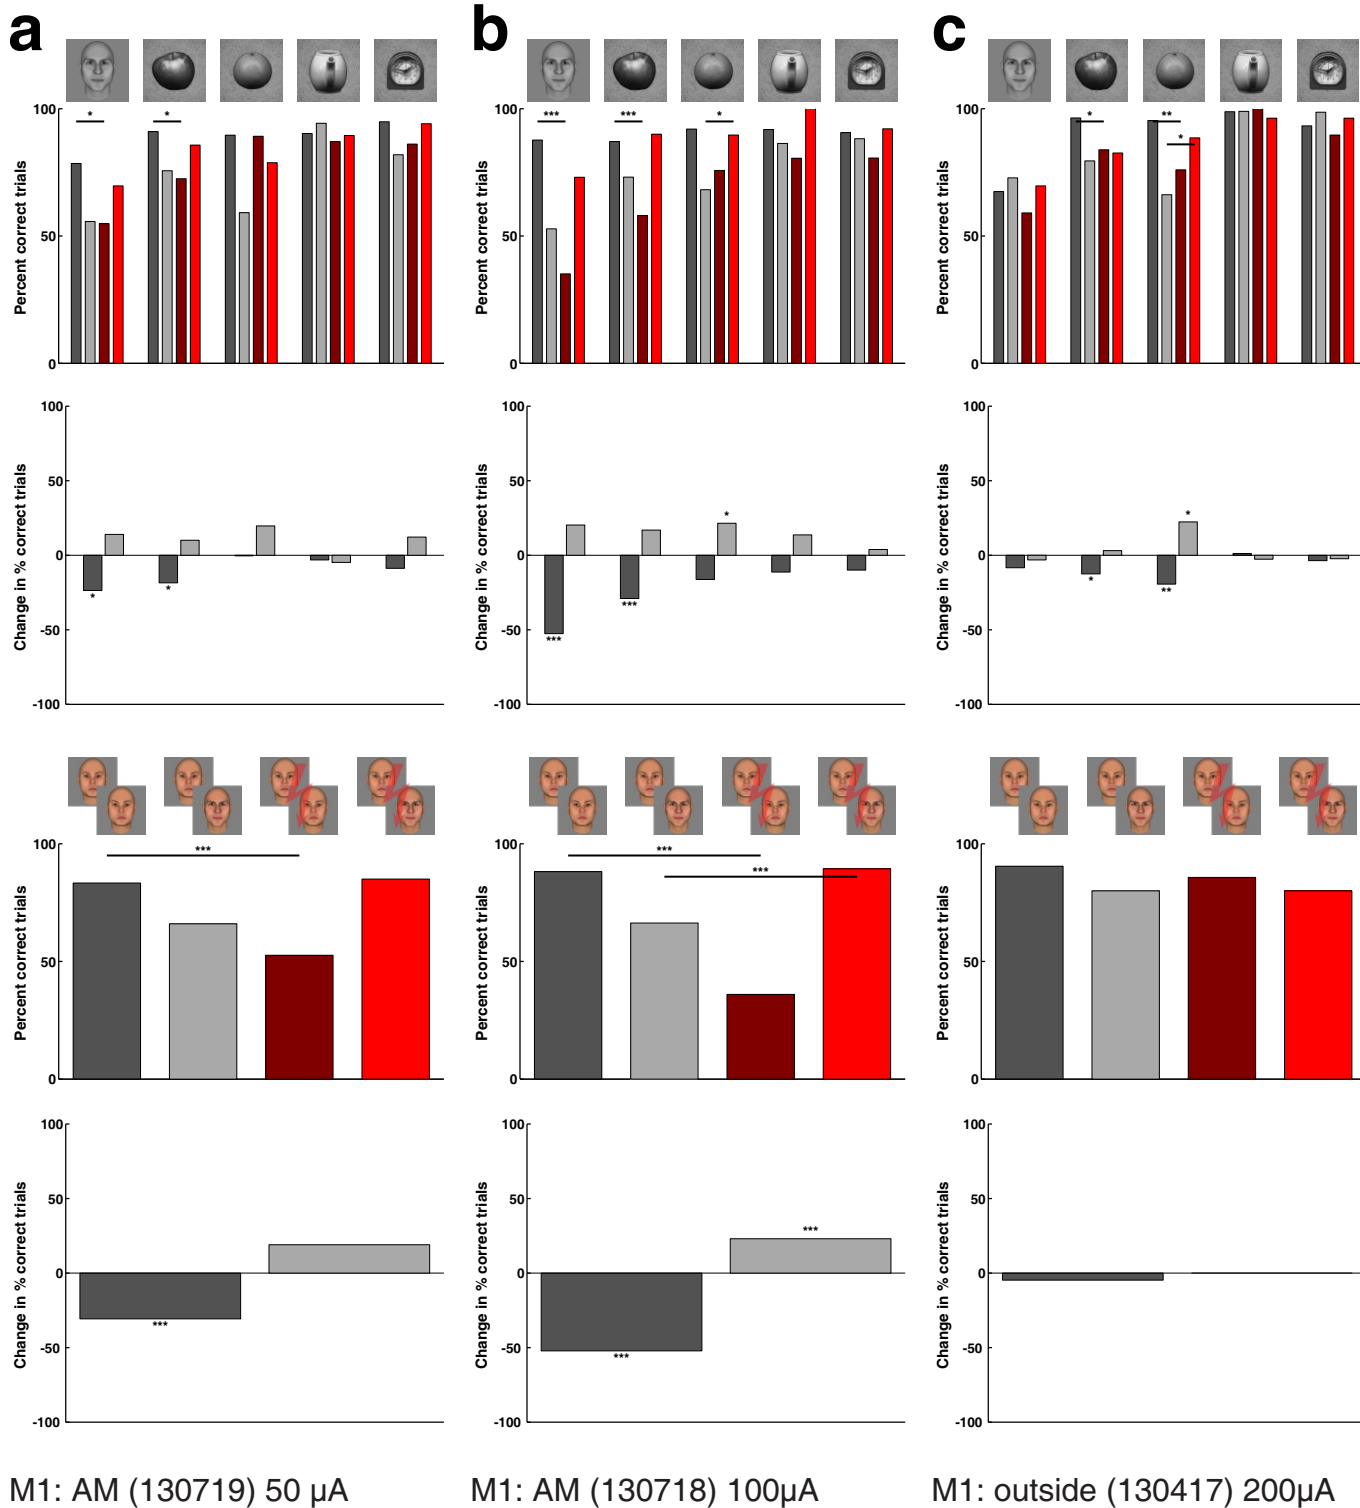

Supplement: NIHMS1697127-supplement-Supplemental_Figure_2.pdf [file NIHMS1697127-supplement-Supplemental_Figure_2.pdf]

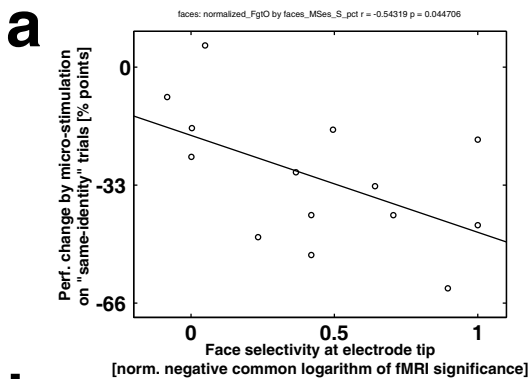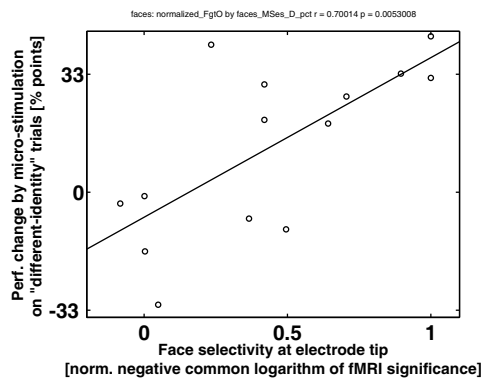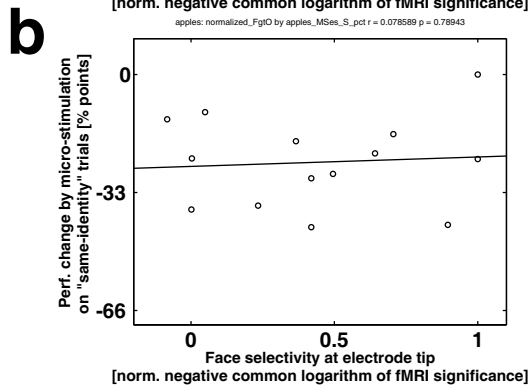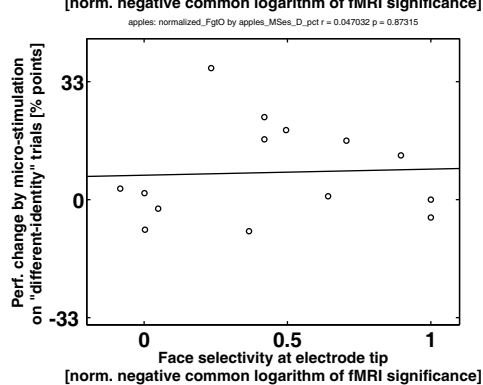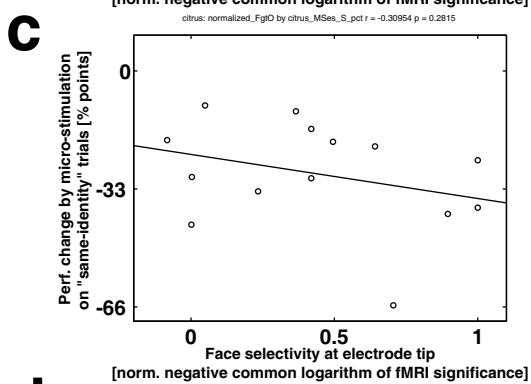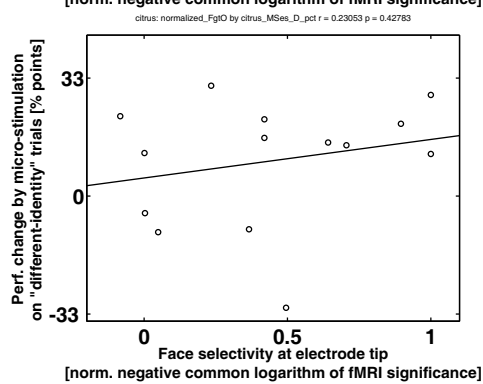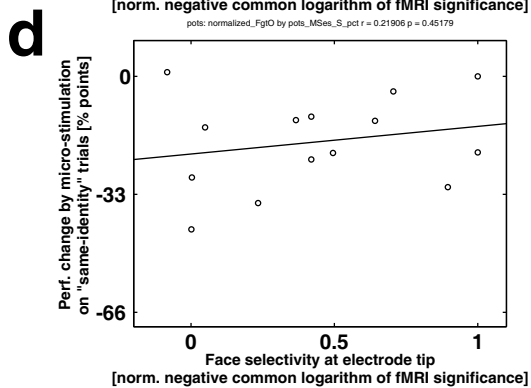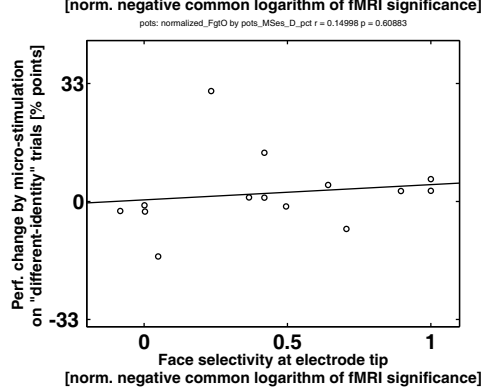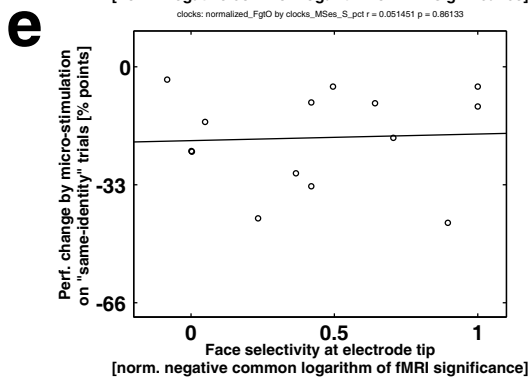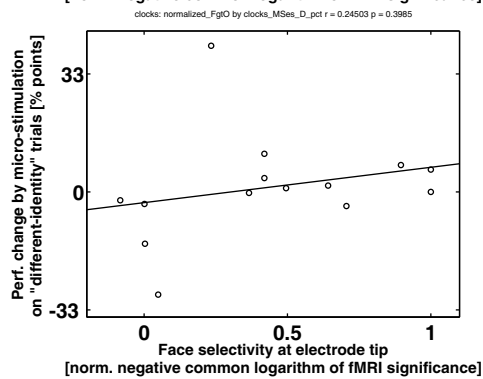

Supplement: NIHMS1697127-supplement-Supplemental_Figure_3.pdf [file NIHMS1697127-supplement-Supplemental_Figure_3.pdf]

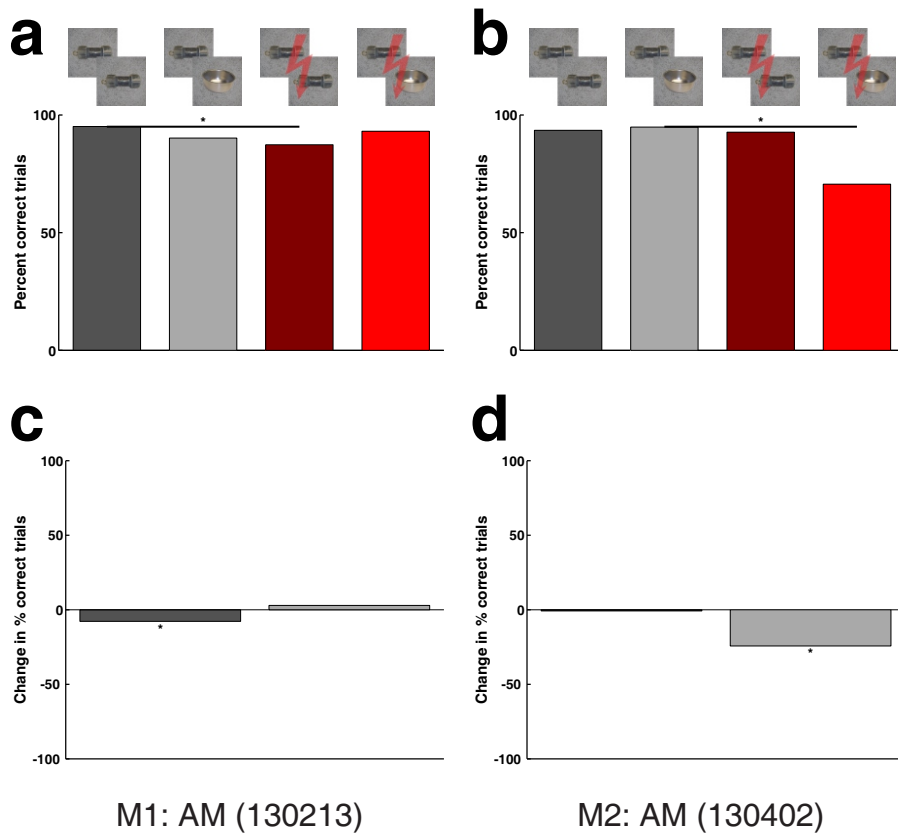

Supplement: NIHMS1697127-supplement-Supplemental_Figure_4.pdf [file NIHMS1697127-supplement-Supplemental_Figure_4.pdf]

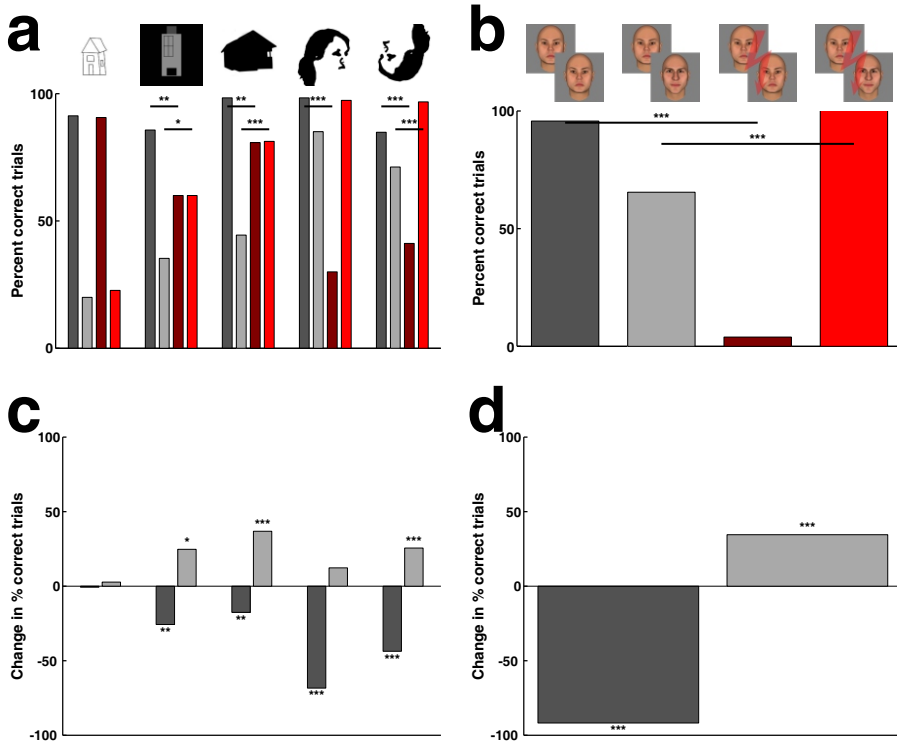

M2: AM (130417)

Supplement: NIHMS1697127-supplement-Supplemental_Figure_5.pdf [file NIHMS1697127-supplement-Supplemental_Figure_5.pdf]

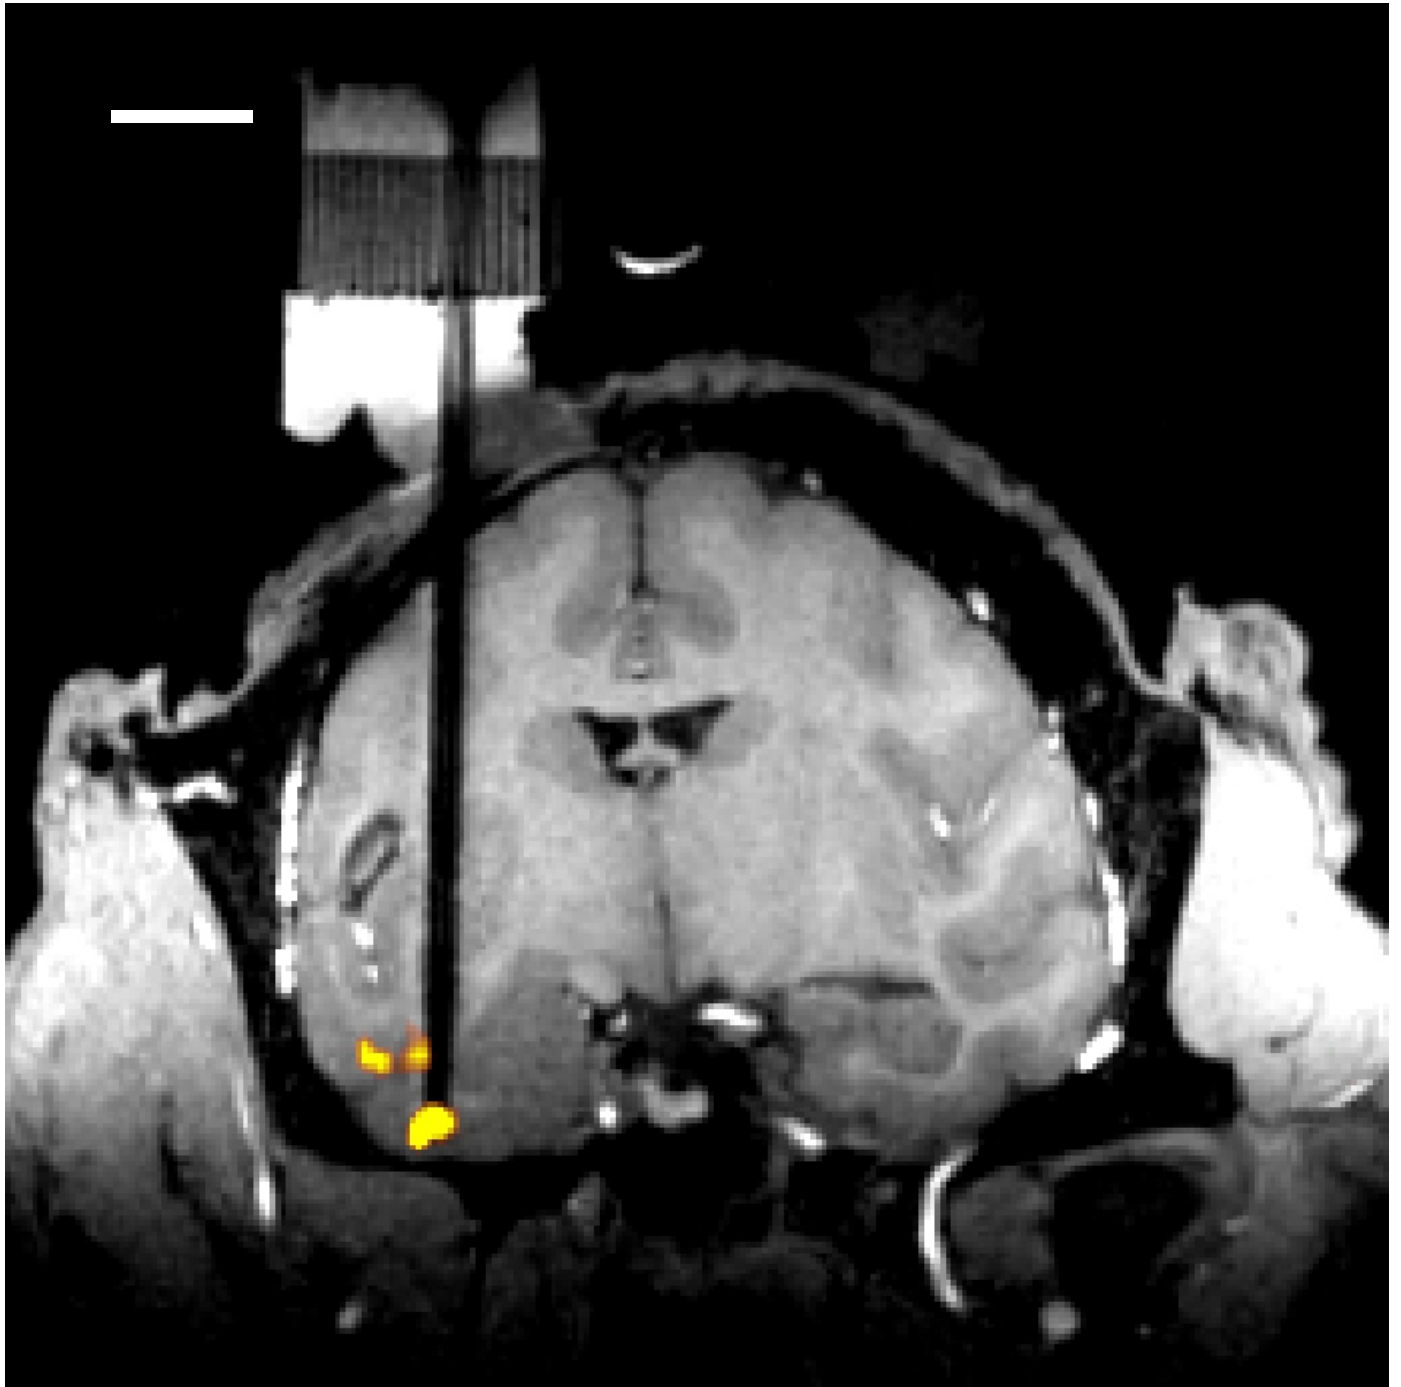

M1 AM (130403)

Supplement: NIHMS1697127-supplement-Supplemental_Figure_6.pdf [file NIHMS1697127-supplement-Supplemental_Figure_6.pdf]

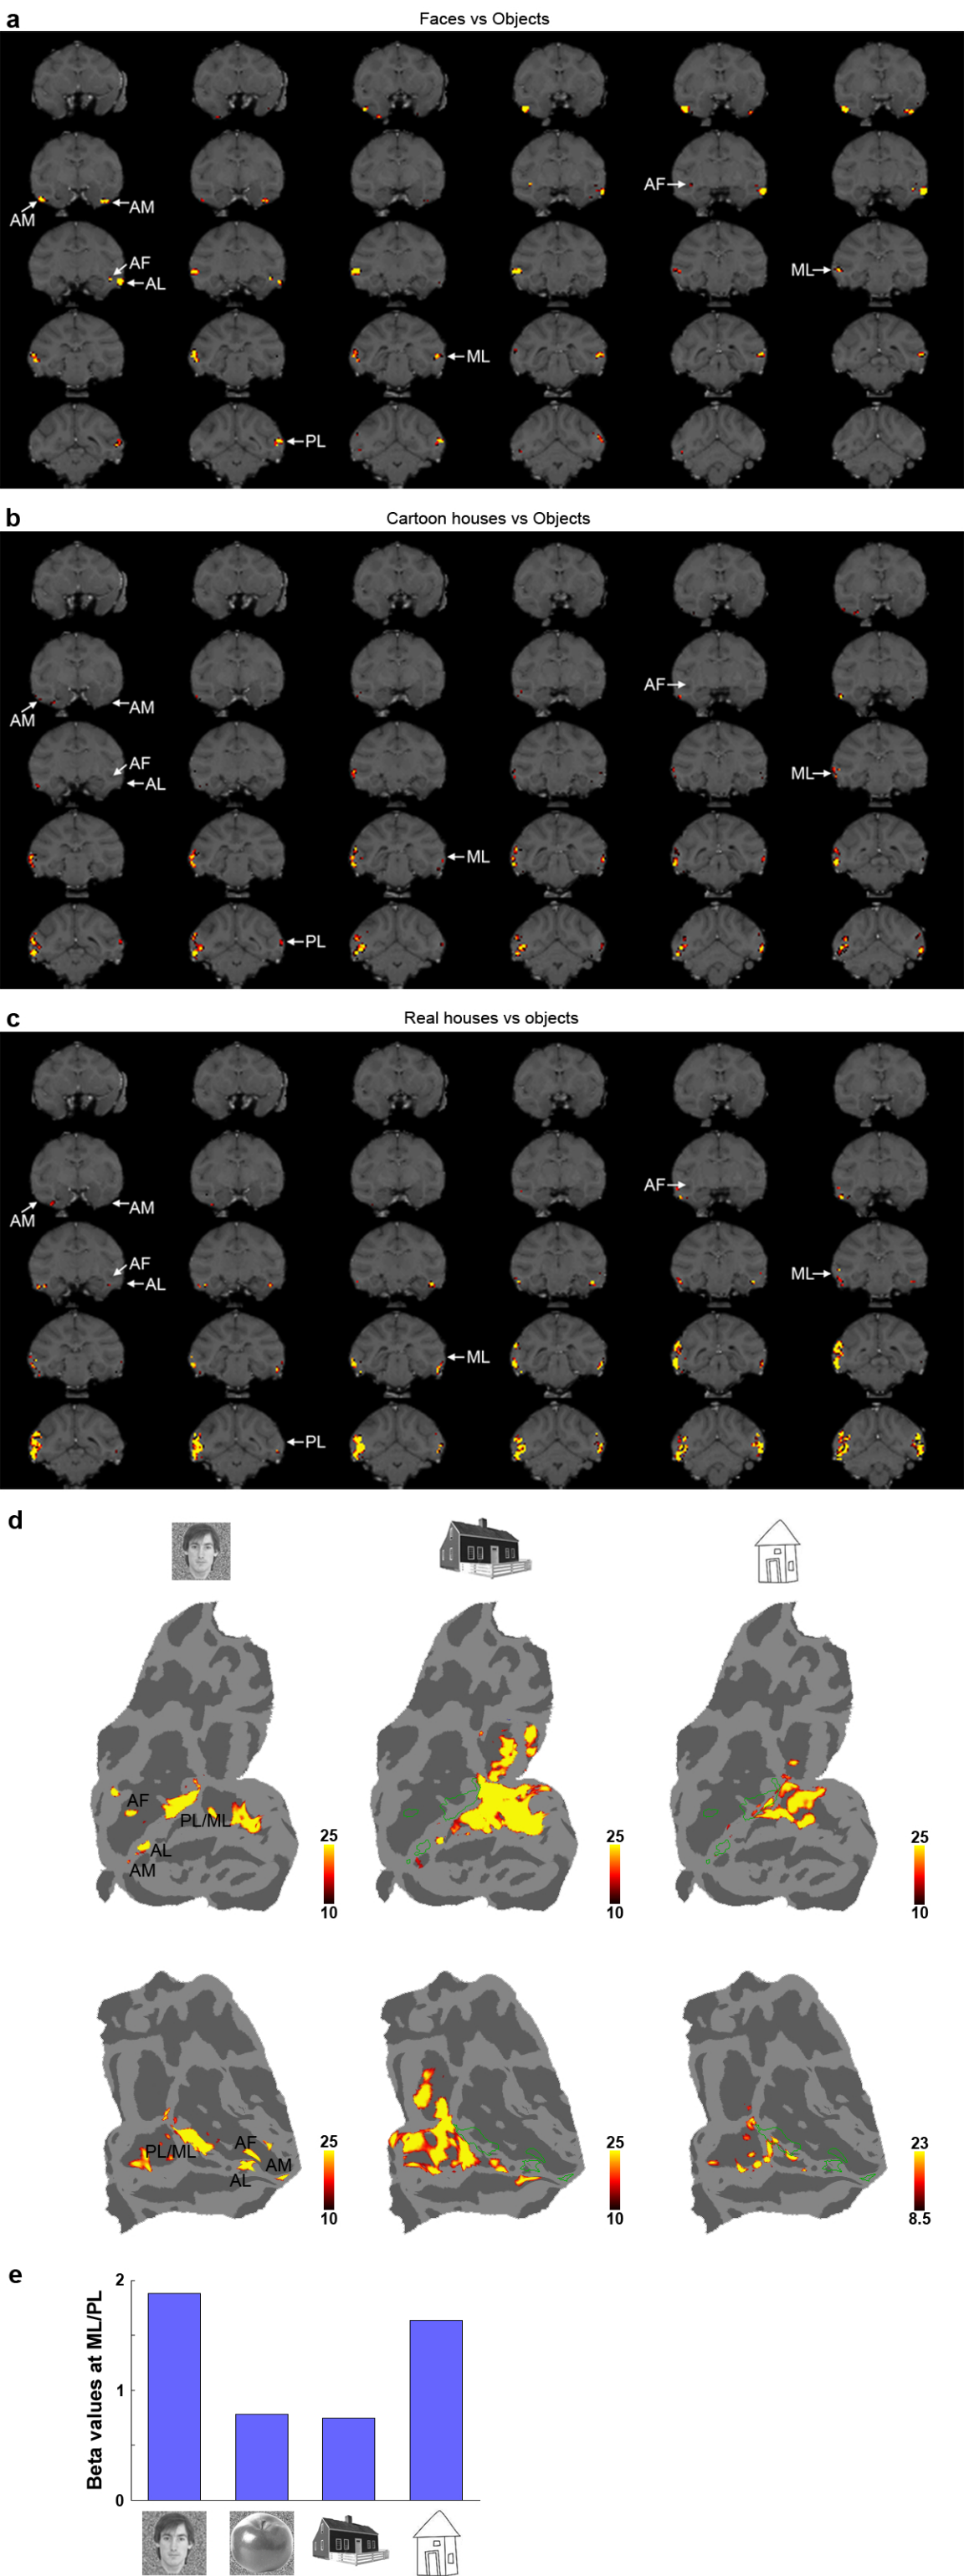

Supplement: NIHMS1697127-supplement-Supplemental_Figure_7.pdf [file NIHMS1697127-supplement-Supplemental_Figure_7.pdf]

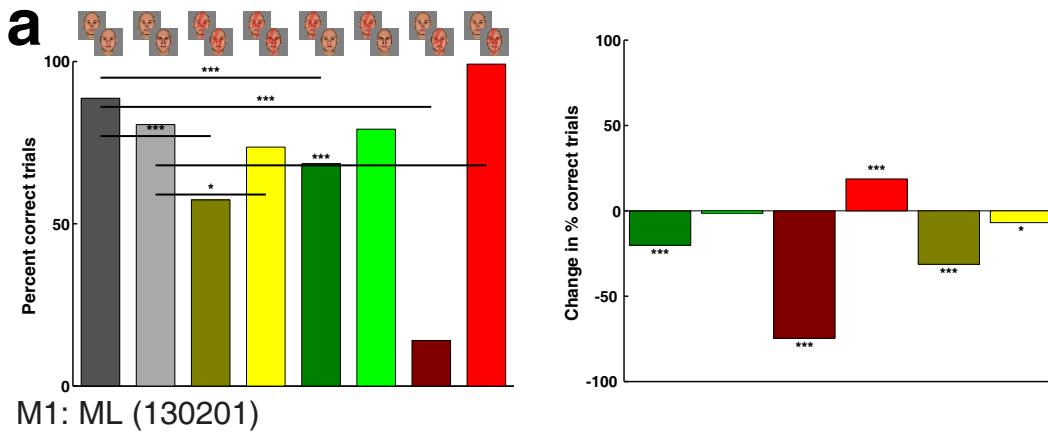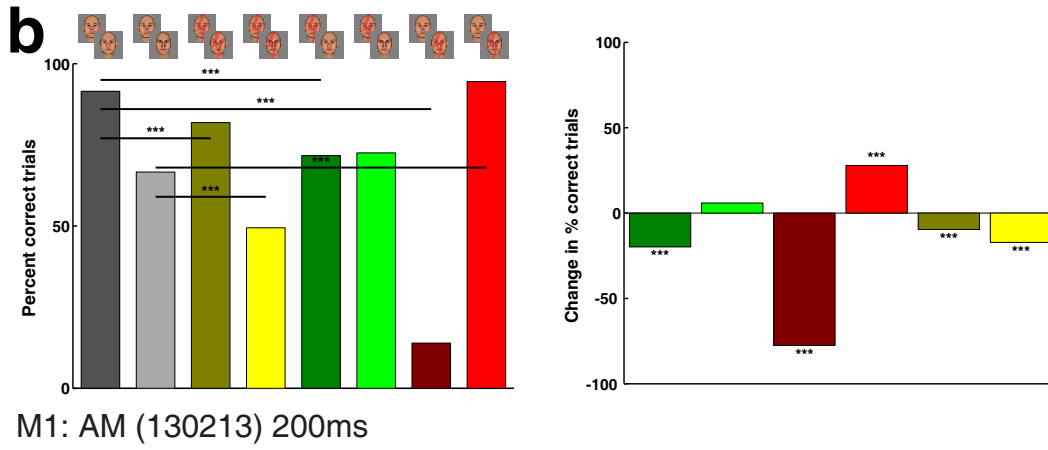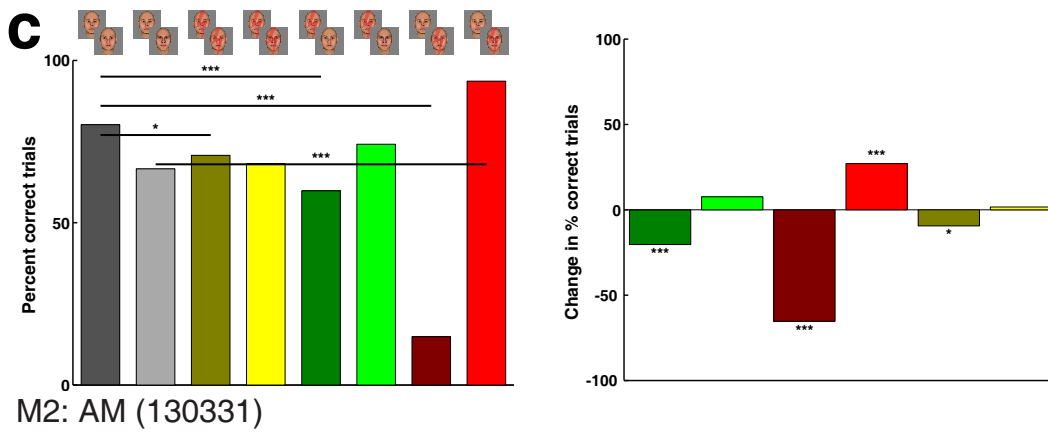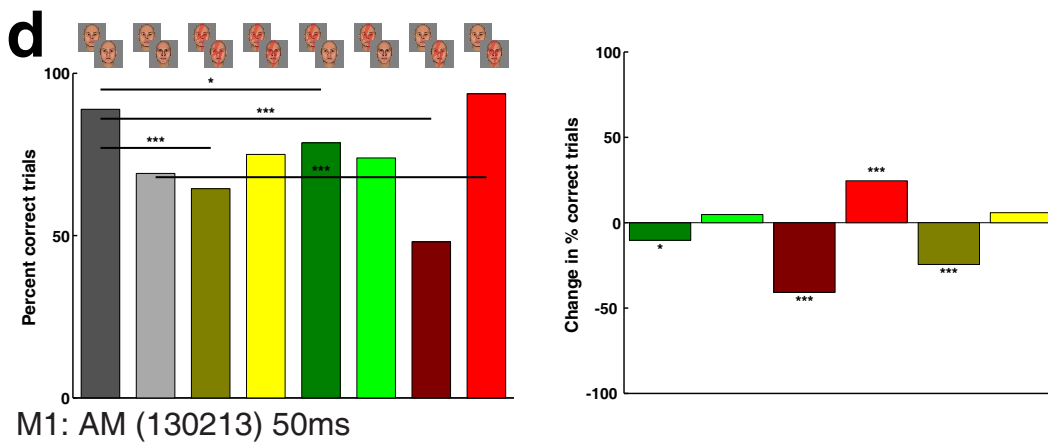

Supplement: NIHMS1697127-supplement-Supplemental_Figure_8.pdf [file NIHMS1697127-supplement-Supplemental_Figure_8.pdf]

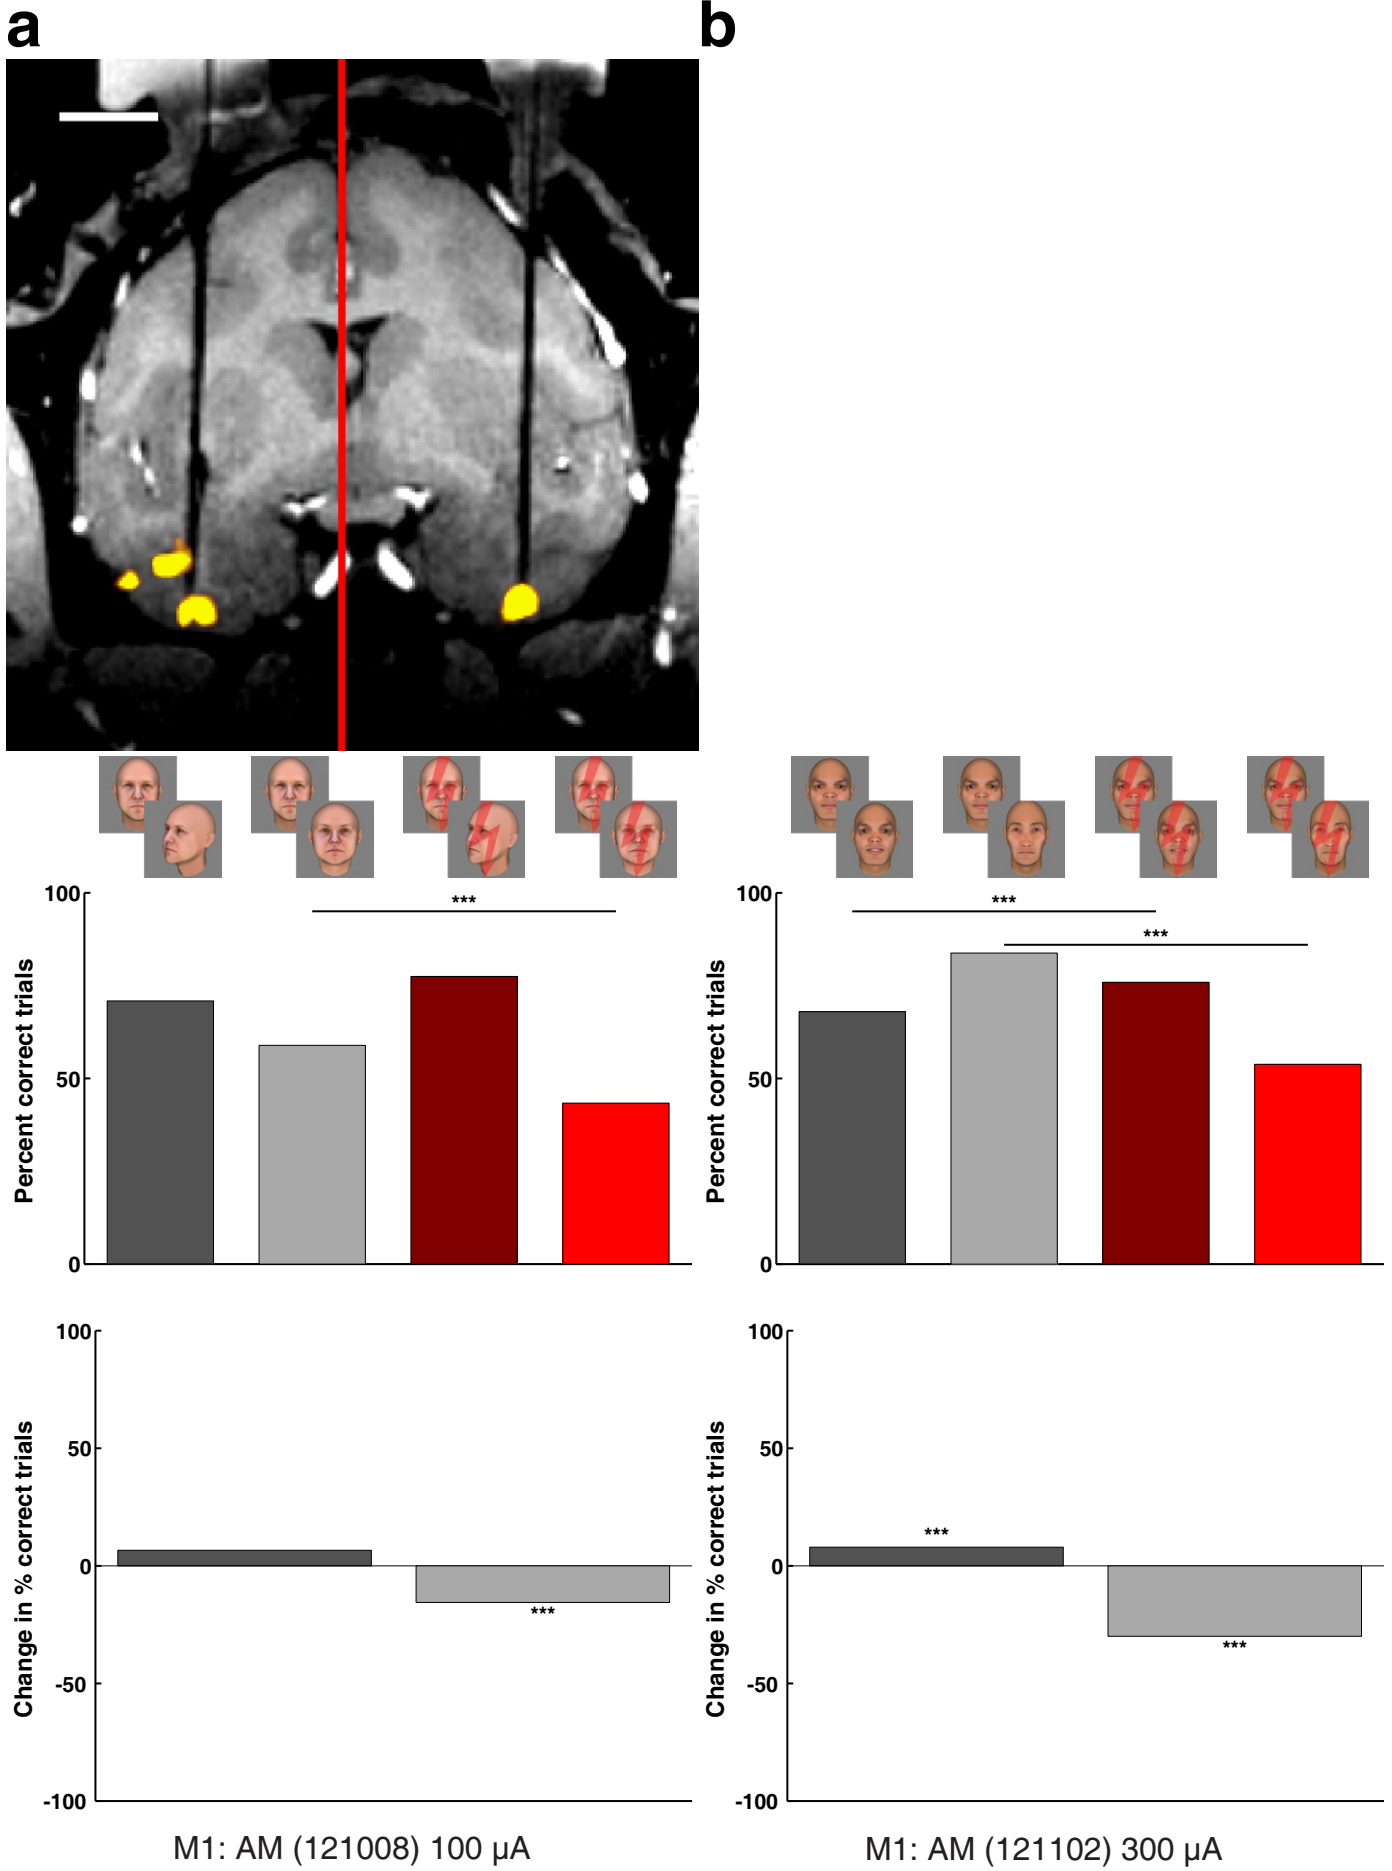

Supplement: NIHMS1697127-supplement-Supplemental_Figure_9.pdf [file NIHMS1697127-supplement-Supplemental_Figure_9.pdf]
